# Supplementary material for: Identification of NCAN as a candidate gene for developmental dyslexia
Source: PubMed Central journal article supplement (PMC5570950; doi:10.1038/s41598-017-10175-7), 2017-08-24

Supplementary Information for

## **Identification of *NCAN* as a candidate gene for developmental dyslexia**

### **Authors**

Elisabet Einarsdottir, Myriam Peyrard-Janvid, Fahimeh Darki, Jetro J. Tuulari, Harri Merisaari, Linnea Karlsson, Noora M. Scheinin, Jani Saunavaara, Riitta Parkkola, Katri Kantojärvi, Antti-Jussi Ämmälä, Nancy Yiu-Lin Yu, Hans Matsson, Jaana Nopola-Hemmi, Hasse Karlsson, Tiina Paunio, Torkel Klingberg, Eira Leinonen, Juha Kere

### **Supplementary methods**

**Supplementary table 1 – List of FANTOM5 human tissues used in correlation analysis.** The brain-tissues and non-tissues together make up the "all tissues" set.

**Supplementary table 2** - Spearman correlation (R) between the expression of known DD susceptibility genes and *NCAN*, as assessed from the FANTOM5 dataset. Values range from -1 (negative correlation) to 1 (positive correlation). The correlations in all tissues (A), brain tissues (B) and non-brain tissues (C) are shown. Correlations over 0.5 are highlighted in yellow, strong positive correlations (>0.8) are highlighted in orange.

**Supplementary table 3** - Regions of white matter significantly associated with genetic variation in several known DD susceptibility genes and *NCAN* (Brainchild dataset).

**Supplementary table 4** – Regions of white matter significantly associated with genetic variation in several known DD susceptibility genes and *NCAN* (Brainchild dataset) using a p 0.01 threshold.

**Supplementary table 5** - Regions of grey matter and their association with genetic variation in *NCAN* (FinnBrain dataset).

**Supplementary table 6** - MNI coordinates for the associations of *NCAN* variants to infant grey matter volumes. (FinnBrain dataset).

**Supplementary figure 1 - All NPL graphs per chromosome**

Non-parametric linkage (NPL) scores for each autosomal chromosome (1-22). The x-axis indicates the position along the chromosome in cM; the y-axis indicates NPL score (LOD). The K&C lin (linear) and exp (exponential) models of weighing are shown (black and blue lines, respectively).

**Supplementary dataset 1 - All NPL values per chromosome**

Non-parametric linkage scores (LOD) and the associated p-value for the linear and the exponential models of weighing, for each of the chromosomes 1-22. This data is presented graphically in Supplementary figure 1.

**Supplementary dataset 2** - All stop/non-synonymous and rare genetic variants within the ten linkage regions of interest, as determined by exome sequencing of individual 3935.

**Supplementary dataset 3**- All stop/non-synonymous and rare genetic variants within the ten linkage regions of interest, as determined by exome sequence data obtained from individual 3821.

Supplementary Methods for

## **Identification of *NCAN* as a candidate gene for developmental dyslexia**

### **Authors**

Elisabet Einarsdottir, Myriam Peyrard-Janvid, Fahimeh Darki, Jetro J. Tuulari, Harri Merisaari, Linnea Karlsson, Noora M. Scheinin, Jani Saunavaara, Riitta Parkkola, Katri Kantojärvi, Antti-Jussi Ämmälä, Nancy Yiu-Lin Yu, Hans Matsson, Jaana Nopola-Hemmi, Hasse Karlsson, Tiina Paunio, Torkel Klingberg, Eira Leinonen, Juha Kere

### **Genotyping and linkage analysis:**

#### *Genotyping*

Two µg of genomic DNA was used by the SNP&SEQ Technology Platform in Uppsala, Sweden for genotyping on Illumina HumanCoreExome12v1-0 genotyping arrays. This array contains assays for 243 345 variants. The genotyping was performed using the Illumina Infinium assay and the results were analyzed using the software GenomeStudio 2011.1 from Illumina (San Diego, US). Genotyping was performed based on cluster files generated from a set of 800 samples genotyped in other projects. Genome build 37 was used as reference. One CEPH control sample with known genotypes (from HapMap) was included in the genotyping. All data storage and the majority of subsequent analyses were performed through the BC|GENE system from BCPlatforms ([www.bcplatforms.com](http://www.bcplatforms.com), Espoo, Finland).

#### *Quality control*

Quality control of the data included removing all individuals with <99% call rate from the analysis, all markers with <95% call rate and any marker with any number of CEPH/HapMap inconsistencies. Subsequently, markers with a minor allele frequency of <5% in the dataset were removed from the analysis. Pedcheck<sup>1</sup> was run to identify inconsistencies in inheritance, identifying low quality genotypes as well as highlighting possible sample mix-ups or incorrectly defined family relationships. All markers showing any inheritance error in any sample were removed from the analysis. Unlikely genotypes were identified using the --

error option in Merlin v1.1.2 ([www.csg.sph.umich.edu/abecasis/Merlin](http://www.csg.sph.umich.edu/abecasis/Merlin))<sup>2</sup>. Any such unlikely genotypes were also removed.

### *Linkage analysis*

We pruned the genotype dataset to avoid inflation of linkage. PLINK v.1.07<sup>3</sup>, ([www.pngu.mgh.harvard.edu/~purcell/plink](http://www.pngu.mgh.harvard.edu/~purcell/plink)) was used to allow no markers within a 50-marker sliding window to have an  $r^2$  of more than 0.2. This reduced set of 28 085 markers was used for subsequent linkage analysis. The information content of the linkage analysis, using the pruned-in set of variants, was on average >95% (as assessed by the --information function of Merlin). The Rutgers genetic map v.3 ([www.compgen.rutgers.edu/download\\_maps.shtml](http://www.compgen.rutgers.edu/download_maps.shtml))<sup>4</sup> was used for the linkage analyses and any marker not found on this map was excluded from subsequent linkage analyses. The output of the analysis is presented as K&C LOD scores<sup>5</sup>, hereafter called NPL, and accompanying p-values.

## **Library preparation, alignment and variant calling for next generation**

### *Exome sequencing:*

One hundred ng of genomic DNA from one affected individual was used for exome sequencing at the Uppsala Genome Center (Science for Life Laboratory, Uppsala University, Uppsala, Sweden). An AmpliSeq library was prepared and run on an Ion Proton (Life Technologies, Carlsbad, CA, US) instrument, according to standard protocols. The sequencing was performed on P1 chips, producing 200 bp reads.

Sequences were aligned to the hg19 genome assembly using the Ion Proton pipeline and single nucleotide variants (SNVs) were called using the Torrent Suite Software (Life Technologies). The total number of mapped reads was 52 784 338; 89.94% of these were on target. 91.94% of the bases were on target. The average coverage of the exons in 3935 was 135x. Target base coverage at 1x: 98.86%. Target base coverage at 20x: 93.45%. Exome variants were annotated using ANNOVAR 17, accessed through wANNOVAR at [www.wannovar.usc.edu](http://www.wannovar.usc.edu).

### *Whole-genome sequencing:*

A TruSeq DNA library (350 bp insert PCR-free DNA) was prepared, followed by

sequencing on an Illumina HiSeqX machine in High Output mode, with PE 2x100bp fragments and average genomic sequencing depth of 30x. .

The WSG sample was analysed simultaneously with four other, independent samples, run through the SciLife in-house Piper pipeline (BWA+GATK 3.5), available on Github (<https://github.com/NationalGenomicsInfrastructure/piper>). The total number of sequence reads was 1 187 654 947, of which 99.71% were successfully aligned to the human hg19 genome reference. The median insert size was 372bp, and the average autosomal coverage was 38x. 83.41% of the reference had 30x or higher coverage. Variant calling was performed using the current GATK best-practice guidelines <sup>6</sup> (with VQSR run on each single sample) and the list of variants was annotated using ANNOVAR.

### **Sanger sequencing**

Sanger sequencing was used to validate the existence of the *NCAN* rs146011974 variant and assess its co-segregation with DD in the pedigree. Ten ng of DNA was amplified by PCR and sequenced by Eurofins Genomics ([www.eurofinsgenomics.eu](http://www.eurofinsgenomics.eu)) according to standard protocols. Primers were designed using Primer3 ([www.bioinfo.ut.ee/primer3](http://www.bioinfo.ut.ee/primer3)), sequences are available upon request.

### **SUPPLEMENTARY REFERENCES**

- 1 O'Connell, J. R. & Weeks, D. E. PedCheck: a program for identification of genotype incompatibilities in linkage analysis. *American journal of human genetics* **63**, 259-266, doi:10.1086/301904 (1998).
- 2 Abecasis, G. R., Cherny, S. S., Cookson, W. O. & Cardon, L. R. Merlin--rapid analysis of dense genetic maps using sparse gene flow trees. *Nature genetics* **30**, 97-101, doi:10.1038/ng786 (2002).
- 3 Purcell, S. *et al.* PLINK: a tool set for whole-genome association and population-based linkage analyses. *American journal of human genetics* **81**, 559-575, doi:10.1086/519795 (2007).

- 4 Matisse, T. C. *et al.* A second-generation combined linkage physical map of  
the human genome. *Genome Res* **17**, 1783-1786, doi:10.1101/gr.7156307  
(2007).
- 5 Kong, A. & Cox, N. J. Allele-sharing models: LOD scores and accurate  
linkage tests. *American journal of human genetics* **61**, 1179-1188,  
doi:10.1086/301592 (1997).
- 6 McKenna, A. *et al.* The Genome Analysis Toolkit: a MapReduce framework  
for analyzing next-generation DNA sequencing data. *Genome Res* **20**,  
1297-1303, doi:10.1101/gr.107524.110 (2010).
- 7 Ashburner, J. A fast diffeomorphic image registration algorithm.  
*NeuroImage* **38**, 95-113, doi:10.1016/j.neuroimage.2007.07.007 (2007).
- 8 Hayasaka, S., Phan, K. L., Liberzon, I., Worsley, K. J. & Nichols, T. E.  
Nonstationary cluster-size inference with random field and permutation  
methods. *NeuroImage* **22**, 676-687,  
doi:10.1016/j.neuroimage.2004.01.041 (2004).
- 9 Darki, F., Peyrard-Janvid, M., Matsson, H., Kere, J. & Klingberg, T. Three  
dyslexia susceptibility genes, DYX1C1, DCDC2, and KIAA0319, affect  
temporo-parietal white matter structure. *Biological psychiatry* **72**, 671-  
676, doi:10.1016/j.biopsych.2012.05.008 (2012).
- 10 Darki, F., Peyrard-Janvid, M., Matsson, H., Kere, J. & Klingberg, T. DCDC2  
polymorphism is associated with left temporoparietal gray and white  
matter structures during development. *The Journal of neuroscience : the  
official journal of the Society for Neuroscience* **34**, 14455-14462,  
doi:10.1523/JNEUROSCI.1216-14.2014 (2014).
- 11 Einarsdottir, E. *et al.* Mutation in CEP63 co-segregating with  
developmental dyslexia in a Swedish family. *Human genetics* **134**, 1239-  
1248, doi:10.1007/s00439-015-1602-1 (2015).
- 12 Hofmeister, W. *et al.* CTNND2-a candidate gene for reading problems and  
mild intellectual disability. *Journal of medical genetics* **52**, 111-122,  
doi:10.1136/jmedgenet-2014-102757 (2015).
- 13 Scerri, T. S. *et al.* The dyslexia candidate locus on 2p12 is associated with  
general cognitive ability and white matter structure. *PloS one* **7**, e50321,  
doi:10.1371/journal.pone.0050321 (2012).

## Supplementary table 1 - FANTOM5 tissues

| Brain-tissues                            | Non-brain tissues                                                  |
|------------------------------------------|--------------------------------------------------------------------|
| amygdala,_adult,_donor10196              | adipose_tissue,_adult,_pool1                                       |
| amygdala,_adult,_donor10252              | aorta,_adult,_pool1                                                |
| brain,_adult,_donor1                     | appendix,_adult                                                    |
| brain,_adult,_pool1                      | bladder,_adult,_pool1                                              |
| caudate_nucleus,_adult,_donor10196       | bone_marrow,_adult                                                 |
| caudate_nucleus,_adult,_donor10252       | breast,_adult,_donor1                                              |
| cerebellum,_adult,_donor10252            | cerebrospinal_fluid,_donor2                                        |
| cerebellum,_adult,_pool1                 | cervix,_adult,_pool1                                               |
| cerebral_meninges,_adult                 | colon,_adult,_donor1                                               |
| corpus_callosum,_adult,_pool1            | colon,_adult,_pool1                                                |
| dura_mater,_adult,_donor1                | colon,_fetal,_donor1                                               |
| frontal_lobe,_adult,_pool1               | cruciate_ligament,_donor2                                          |
| globus_pallidus,_adult,_donor10196       | diaphragm,_fetal,_donor1                                           |
| globus_pallidus,_adult,_donor10252       | diencephalon,_adult                                                |
| hippocampus,_adult,_donor10196           | ductus_deferens,_adult                                             |
| hippocampus,_adult,_donor10252           | duodenum,_fetal,_donor1_rep2                                       |
| insula,_adult,_pool1                     | epididymis,_adult                                                  |
| locus_coeruleus,_adult,_donor10196       | esophagus,_adult,_pool1                                            |
| locus_coeruleus,_adult,_donor10252       | eye,_fetal,_donor1                                                 |
| medial_frontal_gyrus,_adult,_donor10196  | Fingernail_including_nail_plate_eponychium_and_hyponychium,_donor2 |
| medial_temporal_gyrus,_adult,_donor10196 | gall_bladder,_adult                                                |
| medial_temporal_gyrus,_adult,_donor10252 | heart,_mitral_valve,_adult                                         |
| medulla_oblongata,_adult,_donor10196     | heart,_pulmonic_valve,_adult                                       |
| medulla_oblongata,_adult,_donor10252     | heart,_tricuspid_valve,_adult                                      |
| medulla_oblongata,_adult,_pool1          | heart,_adult,_diseased_post_infarction,_donor1                     |
| middle_temporal_gyrus,_donor10252        | heart,_adult,_diseased,_donor1                                     |
| nucleus_accumbens,_adult,_pool1          | heart,_adult,_pool1                                                |
| occipital_cortex,_adult,_donor10252      | heart,_fetal,_pool1                                                |
| occipital_lobe,_adult,_donor1            | kidney,_adult,_pool1                                               |
| occipital_lobe,_fetal,_donor1            | kidney,_fetal,_pool1                                               |
| occipital_pole,_adult,_pool1             | left_atrium,_adult,_donor1                                         |
| paracentral_gyrus,_adult,_pool1          | left_ventricle,_adult,_donor1                                      |
| parietal_lobe,_adult,_donor10196         | liver,_adult,_pool1                                                |
| parietal_lobe,_adult,_donor10252         | lung,_adult,_pool1                                                 |
| parietal_lobe,_adult,_pool1              | lung,_fetal,_donor1                                                |
| parietal_lobe,_fetal,_donor1             | lung,_right_lower_lobe,_adult,_donor1                              |
| pineal_gland,_adult,_donor10196          | lymph_node,_adult,_donor1                                          |
| pineal_gland,_adult,_donor10252          | olfactory_region,_adult                                            |
| pituitary_gland,_adult,_donor10196       | ovary,_adult,_pool1                                                |
| pituitary_gland,_adult,_donor10252       | pancreas,_adult,_donor1                                            |
| pons,_adult,_pool1                       | parotid_gland,_adult                                               |
| postcentral_gyrus,_adult,_pool1          | penis,_adult                                                       |
| putamen,_adult,_donor10196               | placenta,_adult,_pool1                                             |
| substantia_nigra,_adult,_donor10252      | prostate,_adult,_pool1                                             |
| temporal_lobe,_adult,_pool1              | rectum,_fetal,_donor1                                              |
| temporal_lobe,_fetal,_donor1             | retina,_adult,_pool1                                               |
| temporal_lobe,_fetal,_donor1_rep2        | salivary_gland,_adult,_pool1                                       |
| thalamus,_adult,_donor10196              | seminal_vesicle,_adult                                             |
| thalamus,_adult,_donor10252              | skeletal_muscle,_soleus_muscle,_donor1                             |
|                                          | skeletal_muscle,_adult,_pool1                                      |
|                                          | skin,_fetal,_donor1                                                |
|                                          | small_intestine,_adult,_pool1                                      |
|                                          | small_intestine,_fetal,_donor1                                     |
|                                          | smooth_muscle,_adult,_pool1                                        |
|                                          | spinal_cord,_adult,_donor10196                                     |
|                                          | spinal_cord,_adult,_donor10252                                     |
|                                          | spinal_cord,_fetal,_donor1                                         |
|                                          | spleen,_adult,_pool1                                               |
|                                          | spleen,_fetal,_pool1                                               |
|                                          | stomach,_fetal,_donor1                                             |
|                                          | submaxillary_gland,_adult                                          |
|                                          | testis,_adult,_pool1                                               |
|                                          | testis,_adult,_pool2                                               |
|                                          | throat,_adult                                                      |
|                                          | throat,_fetal,_donor1                                              |
|                                          | thymus,_adult,_pool1                                               |
|                                          | thymus,_fetal,_pool1                                               |
|                                          | thyroid,_adult,_pool1                                              |
|                                          | thyroid,_fetal,_donor1                                             |
|                                          | tongue,_adult                                                      |
|                                          | tongue,_fetal,_donor1                                              |
|                                          | tonsil,_adult,_pool1                                               |
|                                          | trachea,_adult,_pool1                                              |
|                                          | trachea,_fetal,_donor1                                             |
|                                          | uterus,_adult,_pool1                                               |
|                                          | uterus,_fetal,_donor1                                              |
|                                          | vagina,_adult                                                      |
|                                          | vein,_adult                                                        |

Supplementary table S2 - Spearman correlations of a set of representative DD genes

A - ALL TISSUES

|           | GCFC2  | MRPL19 | FOXP2  | NCAN   | KIAA0319 | CYP19A1 | KIAA0319L | DCDC2  | PCNT   | ROBO1  | CTNND2 | CNTNAP2 | CEP63  | DYX1C1 | GRIN2B |
|-----------|--------|--------|--------|--------|----------|---------|-----------|--------|--------|--------|--------|---------|--------|--------|--------|
| GCFC2     | 1      | 0,070  | 0,041  | -0,201 | -0,217   | -0,026  | -0,110    | 0,218  | 0,075  | 0,118  | -0,212 | -0,134  | 0,207  | 0,075  | -0,215 |
| MRPL19    | 0,070  | 1      | -0,221 | 0,430  | 0,354    | -0,203  | 0,265     | -0,247 | 0,187  | 0,203  | 0,471  | 0,503   | 0,294  | 0,237  | 0,435  |
| FOXP2     | 0,041  | -0,221 | 1      | -0,183 | -0,103   | -0,099  | -0,231    | 0,197  | -0,072 | -0,006 | -0,320 | -0,227  | -0,247 | -0,007 | -0,088 |
| NCAN      | -0,201 | 0,430  | -0,183 | 1      | 0,824    | -0,282  | 0,343     | -0,188 | 0,254  | 0,486  | 0,806  | 0,837   | 0,205  | 0,467  | 0,872  |
| KIAA0319  | -0,217 | 0,354  | -0,103 | 0,824  | 1        | -0,391  | 0,338     | -0,030 | 0,264  | 0,411  | 0,793  | 0,754   | 0,280  | 0,577  | 0,813  |
| CYP19A1   | -0,026 | -0,203 | -0,099 | -0,282 | -0,391   | 1       | -0,088    | 0,002  | -0,272 | -0,149 | -0,290 | -0,309  | -0,188 | -0,277 | -0,263 |
| KIAA0319L | -0,110 | 0,265  | -0,231 | 0,343  | 0,338    | -0,088  | 1         | 0,111  | 0,073  | -0,031 | 0,361  | 0,311   | -0,124 | 0,179  | 0,407  |
| DCDC2     | 0,218  | -0,247 | 0,197  | -0,188 | -0,030   | 0,002   | 0,111     | 1      | -0,361 | -0,093 | -0,174 | -0,186  | -0,283 | 0,294  | -0,247 |
| PCNT      | 0,075  | 0,187  | -0,072 | 0,254  | 0,264    | -0,272  | 0,073     | -0,361 | 1      | 0,264  | 0,272  | 0,219   | 0,366  | 0,159  | 0,321  |
| ROBO1     | 0,118  | 0,203  | -0,006 | 0,486  | 0,411    | -0,149  | -0,031    | -0,093 | 0,264  | 1      | 0,417  | 0,467   | 0,153  | 0,362  | 0,449  |
| CTNND2    | -0,212 | 0,471  | -0,320 | 0,806  | 0,793    | -0,290  | 0,361     | -0,174 | 0,272  | 0,417  | 1      | 0,784   | 0,271  | 0,473  | 0,716  |
| CNTNAP2   | -0,134 | 0,503  | -0,227 | 0,837  | 0,754    | -0,309  | 0,311     | -0,186 | 0,219  | 0,467  | 0,784  | 1       | 0,272  | 0,476  | 0,717  |
| CEP63     | 0,207  | 0,294  | -0,247 | 0,205  | 0,280    | -0,188  | -0,124    | -0,283 | 0,366  | 0,153  | 0,271  | 0,272   | 1      | 0,369  | 0,244  |
| DYX1C1    | 0,075  | 0,237  | -0,007 | 0,467  | 0,577    | -0,277  | 0,179     | 0,294  | 0,159  | 0,362  | 0,473  | 0,476   | 0,369  | 1      | 0,406  |
| GRIN2B    | -0,215 | 0,435  | -0,088 | 0,872  | 0,813    | -0,263  | 0,407     | -0,247 | 0,321  | 0,449  | 0,716  | 0,717   | 0,244  | 0,406  | 1      |

B -BRAIN TISSUES

|           | GCFC2  | MRPL19 | FOXP2  | NCAN   | KIAA0319 | CYP19A1 | KIAA0319L | DCDC2  | PCNT   | ROBO1  | CTNND2 | CNTNAP2 | CEP63  | DYX1C1 | GRIN2B |
|-----------|--------|--------|--------|--------|----------|---------|-----------|--------|--------|--------|--------|---------|--------|--------|--------|
| GCFC2     | 1      | 0,194  | -0,030 | -0,233 | -0,110   | -0,192  | -0,328    | 0,166  | 0,239  | 0,156  | 0,028  | -0,093  | 0,318  | 0,203  | -0,209 |
| MRPL19    | 0,194  | 1      | -0,234 | -0,150 | -0,156   | 0,086   | -0,011    | -0,081 | 0,073  | 0,013  | 0,326  | 0,279   | 0,246  | -0,033 | -0,102 |
| FOXP2     | -0,030 | -0,234 | 1      | 0,489  | 0,403    | 0,162   | -0,001    | 0,011  | 0,278  | 0,320  | 0,085  | 0,083   | -0,229 | 0,171  | 0,599  |
| NCAN      | -0,233 | -0,150 | 0,489  | 1      | 0,746    | 0,140   | 0,244     | 0,089  | 0,077  | 0,215  | 0,036  | 0,141   | -0,369 | 0,023  | 0,836  |
| KIAA0319  | -0,110 | -0,156 | 0,403  | 0,746  | 1        | -0,089  | 0,077     | 0,054  | 0,119  | 0,094  | -0,107 | 0,089   | -0,055 | 0,078  | 0,784  |
| CYP19A1   | -0,192 | 0,086  | 0,162  | 0,140  | -0,089   | 1       | 0,484     | 0,084  | -0,227 | -0,021 | -0,067 | 0,162   | -0,586 | -0,324 | 0,045  |
| KIAA0319L | -0,328 | -0,011 | -0,001 | 0,244  | 0,077    | 0,484   | 1         | -0,055 | 0,056  | -0,092 | -0,124 | 0,183   | -0,449 | -0,219 | 0,162  |
| DCDC2     | 0,166  | -0,081 | 0,011  | 0,089  | 0,054    | 0,084   | -0,055    | 1      | -0,060 | 0,126  | -0,097 | -0,087  | -0,187 | 0,241  | -0,070 |
| PCNT      | 0,239  | 0,073  | 0,278  | 0,077  | 0,119    | -0,227  | 0,056     | -0,060 | 1      | 0,417  | 0,285  | 0,008   | 0,213  | 0,356  | 0,147  |
| ROBO1     | 0,156  | 0,013  | 0,320  | 0,215  | 0,094    | -0,021  | -0,092    | 0,126  | 0,417  | 1      | 0,196  | -0,141  | -0,128 | 0,314  | 0,275  |
| CTNND2    | 0,028  | 0,326  | 0,085  | 0,036  | -0,107   | -0,067  | -0,124    | -0,097 | 0,285  | 0,196  | 1      | 0,231   | -0,087 | -0,106 | 0,077  |
| CNTNAP2   | -0,093 | 0,279  | 0,083  | 0,141  | 0,089    | 0,162   | 0,183     | -0,087 | 0,008  | -0,141 | 0,231  | 1       | 0,017  | -0,026 | 0,105  |
| CEP63     | 0,318  | 0,246  | -0,229 | -0,369 | -0,055   | -0,586  | -0,449    | -0,187 | 0,213  | -0,128 | -0,087 | 0,017   | 1      | 0,408  | -0,193 |
| DYX1C1    | 0,203  | -0,033 | 0,171  | 0,023  | 0,078    | -0,324  | -0,219    | 0,241  | 0,356  | 0,314  | -0,106 | -0,026  | 0,408  | 1      | 0,127  |
| GRIN2B    | -0,209 | -0,102 | 0,599  | 0,836  | 0,784    | 0,045   | 0,162     | -0,070 | 0,147  | 0,275  | 0,077  | 0,105   | -0,193 | 0,127  | 1      |

C -NON-BRAIN TISSUES

|           | GCFC2  | MRPL19 | FOXP2  | NCAN   | KIAA0319 | CYP19A1 | KIAA0319L | DCDC2  | PCNT   | ROBO1  | CTNND2 | CNTNAP2 | CEP63  | DYX1C1 | GRIN2B |
|-----------|--------|--------|--------|--------|----------|---------|-----------|--------|--------|--------|--------|---------|--------|--------|--------|
| GCFC2     | 1      | 0,226  | 0,002  | 0,088  | -0,121   | -0,056  | 0,044     | 0,174  | 0,131  | 0,223  | -0,123 | 0,135   | 0,311  | 0,170  | 0,028  |
| MRPL19    | 0,226  | 1      | -0,016 | 0,070  | -0,148   | -0,059  | 0,083     | -0,176 | -0,027 | 0,012  | -0,022 | 0,121   | 0,082  | -0,003 | 0,255  |
| FOXP2     | 0,002  | -0,016 | 1      | -0,145 | 0,182    | -0,280  | -0,132    | 0,172  | -0,053 | 0,004  | -0,201 | 0,014   | -0,128 | 0,141  | -0,066 |
| NCAN      | 0,088  | 0,070  | -0,145 | 1      | 0,398    | -0,122  | 0,016     | 0,041  | 0,020  | 0,417  | 0,544  | 0,651   | -0,083 | 0,312  | 0,440  |
| KIAA0319  | -0,121 | -0,148 | 0,182  | 0,398  | 1        | -0,271  | 0,071     | 0,284  | -0,047 | 0,181  | 0,535  | 0,394   | -0,032 | 0,476  | 0,325  |
| CYP19A1   | -0,056 | -0,059 | -0,280 | -0,122 | -0,271   | 1       | -0,148    | -0,102 | -0,198 | -0,057 | -0,080 | -0,213  | 0,127  | -0,128 | -0,181 |
| KIAA0319L | 0,044  | 0,083  | -0,132 | 0,016  | 0,071    | -0,148  | 1         | 0,333  | -0,113 | -0,335 | 0,196  | -0,045  | -0,250 | 0,065  | 0,185  |
| DCDC2     | 0,174  | -0,176 | 0,172  | 0,041  | 0,284    | -0,102  | 0,333     | 1      | -0,428 | -0,057 | 0,091  | 0,050   | -0,232 | 0,541  | -0,087 |
| PCNT      | 0,131  | -0,027 | -0,053 | 0,020  | -0,047   | -0,198  | -0,113    | -0,428 | 1      | 0,059  | 0,008  | -0,060  | 0,306  | -0,129 | 0,088  |
| ROBO1     | 0,223  | 0,012  | 0,004  | 0,417  | 0,181    | -0,057  | -0,335    | -0,057 | 0,059  | 1      | 0,181  | 0,482   | 0,071  | 0,280  | 0,194  |
| CTNND2    | -0,123 | -0,022 | -0,201 | 0,544  | 0,535    | -0,080  | 0,196     | 0,091  | 0,008  | 0,181  | 1      | 0,352   | -0,131 | 0,303  | 0,321  |
| CNTNAP2   | 0,135  | 0,121  | 0,014  | 0,651  | 0,394    | -0,213  | -0,045    | 0,050  | -0,060 | 0,482  | 0,352  | 1       | -0,138 | 0,295  | 0,322  |
| CEP63     | 0,311  | 0,082  | -0,128 | -0,083 | -0,032   | 0,127   | -0,250    | -0,232 | 0,306  | 0,071  | -0,131 | -0,138  | 1      | 0,103  | 0,056  |
| DYX1C1    | 0,170  | -0,003 | 0,141  | 0,312  | 0,476    | -0,128  | 0,065     | 0,541  | -0,129 | 0,280  | 0,303  | 0,295   | 0,103  | 1      | 0,210  |
| GRIN2B    | 0,028  | 0,255  | -0,066 | 0,440  | 0,325    | -0,181  | 0,185     | -0,087 | 0,088  | 0,194  | 0,321  | 0,322   | 0,056  | 0,210  | 1      |



**Supplementary table S3. White matter density correlates with variation in dyslexia genes**

| Variant   | Gene            | Cluster p-value        | Peak coordinates |     |    | Genotypes* | Brain region                                |
|-----------|-----------------|------------------------|------------------|-----|----|------------|---------------------------------------------|
|           |                 |                        |                  |     |    |            |                                             |
| rs3743204 | <i>DYX1C1</i>   | $1.28 \times 10^{-10}$ | -16              | -54 | 18 | GG>GT/TT   | bilateral temporoparietal                   |
| rs793842  | <i>DCDC2</i>    | $8.19 \times 10^{-5}$  | -28              | -70 | 33 | CC>CT>TT   | left temporoparietal                        |
| rs6935076 | <i>KIAA0319</i> | $3.33 \times 10^{-10}$ | -34              | -58 | 31 | CC>CT>TT   | bilateral temporoparietal                   |
| rs917235  | <i>MRPL19</i>   | $1.27 \times 10^{-3}$  | -13              | -8  | 8  | AA>GG      | bilateral temporoparietal                   |
| rs2561622 | <i>CTNND2</i>   | $1.28 \times 10^{-5}$  | -47              | 25  | 22 | GG>AG>AA   | left frontal                                |
| rs7519451 | <i>CEP63</i>    | $7.60 \times 10^{-3}$  | 28               | -55 | 29 | AA/AC>CC   | right temporoparietal                       |
| rs1064395 | <i>NCAN</i>     | $1.56 \times 10^{-6}$  | 44               | -36 | 13 | TC>CC      | right temporoparietal and frontal           |
|           |                 | $4.48 \times 10^{-10}$ | -39              | 20  | 20 | TC>CC      | left temporoparietal, frontal and occipital |

\* Genotype groups ordered according to the highest white matter density in each specific cluster

## Supplementary table S4

Associations to white matter volume  $p < 0.01$

| Brain region                            | Coordinates in SPM MNI space |     |    | Cluster size | peak<br>T | cluster                |                        |
|-----------------------------------------|------------------------------|-----|----|--------------|-----------|------------------------|------------------------|
|                                         | x                            | y   | z  |              |           | p(FWE-corr)            | p(FDR-corr)            |
| right temporoparietal and frontal       | 44                           | -36 | 13 | 7878         | 6,51      | $1.56 \times 10^{-6}$  | $1.04 \times 10^{-6}$  |
| left temporoparietal, frontal and occip | -39                          | 20  | 20 | 14355        | 5,13      | $4.48 \times 10^{-10}$ | $5.96 \times 10^{-10}$ |

Associations to white matter volume  $p < 0.001$

| Brain region                            | Coordinates in SPM MNI space |     |    | Cluster size | peak<br>T | cluster               |                       |
|-----------------------------------------|------------------------------|-----|----|--------------|-----------|-----------------------|-----------------------|
|                                         | x                            | y   | z  |              |           | p(FWE-corr)           | p(FDR-corr)           |
| right temporoparietal and frontal       | 44                           | -36 | 13 | 3549         | 6,51      | $8.13 \times 10^{-8}$ | $2.88 \times 10^{-7}$ |
| left temporoparietal, frontal and occip | -39                          | 20  | 20 | 3312         | 5,13      | $1.82 \times 10^{-7}$ | $3.23 \times 10^{-7}$ |

Associations to white matter volume  $p < 0.05$  (FDR)

| Brain region                            | Coordinates in SPM MNI space |     |    | Cluster size | peak<br>T | cluster              |                      |
|-----------------------------------------|------------------------------|-----|----|--------------|-----------|----------------------|----------------------|
|                                         | x                            | y   | z  |              |           | p(FWE-corr)          | p(FDR-corr)          |
| right temporoparietal and frontal       | 44                           | -36 | 13 | 361          | 6,51      | $9.6 \times 10^{-6}$ | $1.8 \times 10^{-3}$ |
| left temporoparietal, frontal and occip | -39                          | 20  | 20 | 75           | 5,13      | $2.5 \times 10^{-3}$ | 0,04                 |

**Supplementary table 5.** Linear regression analysis of rs1064395 (NCAN) to grey matter volumes in newfant brain.

| <b>A</b>                  | <b>Rs1064395*</b> |             |
|---------------------------|-------------------|-------------|
| <b>Grey matter volume</b> | $\beta$           | <b>P</b>    |
| Total                     | .347              | .175        |
| Brain regions:            |                   |             |
| Frontal                   | .424              | .115        |
| Cingulate                 | .516              | <b>.049</b> |
| Limbic                    | .365              | .183        |
| Occipital                 | .226              | .393        |
| Parietal                  | .414              | .077        |
| Temporal                  | .196              | .406        |

\* MAF=.12; for genotypes Maj/Maj n=20, Maj/Min n=6

| <b>B</b>                 | <b>Rs1064395</b> |             |
|--------------------------|------------------|-------------|
| <b>Parietal lobe</b>     | $\beta$          | <b>P</b>    |
| Postcentral gyrus        | .515             | <b>.045</b> |
| Superior parietal gyrus  | -.126            | .614        |
| Inferior parietal lobule | .501             | <b>.042</b> |
| Supramarginal gyrus      | .657             | <b>.005</b> |
| Angular gyrus            | -.085            | .718        |
| Precuneus                | .463             | .066        |
| Paracentral lobule       | .148             | .571        |

| <b>C</b>                  | <b>Rs1064395</b> |             |
|---------------------------|------------------|-------------|
| <b>Cingulate</b>          | $\beta$          | <b>P</b>    |
| Anterior cingulate gyrus  | .419             | .121        |
| Middle cingulate gyrus    | .547             | <b>.031</b> |
| Posterior cingulate gyrus | .180             | .517        |

## Supplementary table S6

### A. Associations to infant grey matter volume $p < 0.001$ , FDR corrected

| Brain region (iBEAT AAL label)     | Coordinates in SPM MNI space |    |    | Cluster size | peak | cluster     |
|------------------------------------|------------------------------|----|----|--------------|------|-------------|
|                                    | x                            | y  | z  |              | T    | p(FDR-corr) |
| Left inferior parietal lobule (61) | -30                          | -6 | 14 | 484          | 4.72 | 0.001       |
| Right precentral gyrus (2)         | 28                           | 10 | 12 | 411          | 4.40 | 0.001       |
| Right middle frontal gyrus (8)     | 30                           | 26 | 10 | 192          | 3.99 | 0.011       |

### B. Associations to infant grey matter volume $p < 0.01$ , FDR corrected

| Brain region (iBEAT AAL label)     | Coordinates in SPM MNI space |    |    | Cluster size | peak | cluster     |
|------------------------------------|------------------------------|----|----|--------------|------|-------------|
|                                    | x                            | y  | z  |              | T    | p(FDR-corr) |
| Left inferior parietal lobule (61) | -30                          | -6 | 14 | 1681         | 4.72 | 0.000       |
| Right precentral gyrus (2)         | 28                           | 10 | 12 | 3387         | 4.40 | 0.000       |
| Right middle frontal gyrus (8)     | 30                           | 26 | 10 |              | 3.99 |             |
| Right postcentral gyrus (58)       | 34                           | 4  | 16 |              | 3.17 |             |
| Right middle cingulate gyrus (34)  | 4                            | 14 | 6  | 1806         | 3.46 | 0.000       |
| Left middle cingulate gyrus (33)   | -4                           | 20 | 8  |              | 2.97 |             |

# AFFSTAT [ALL]

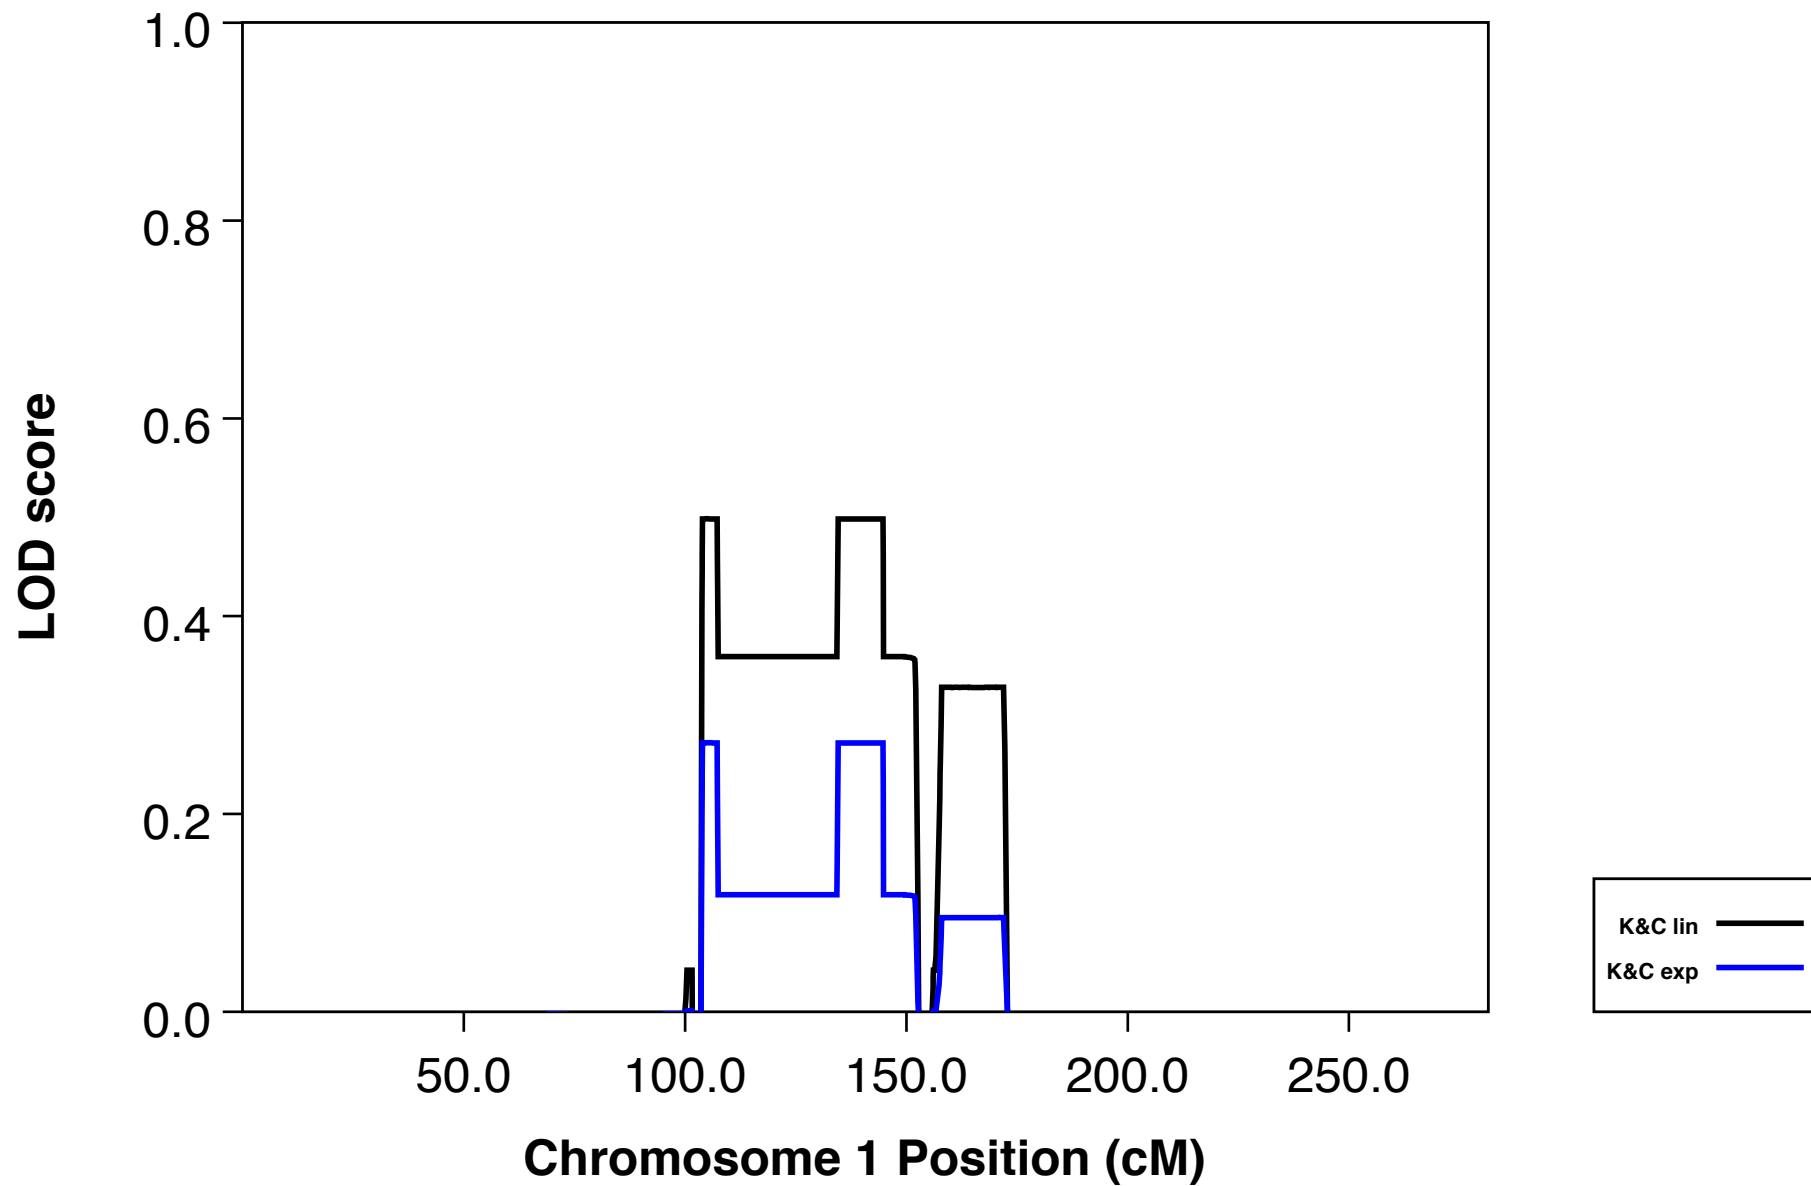

# AFFSTAT [ALL]

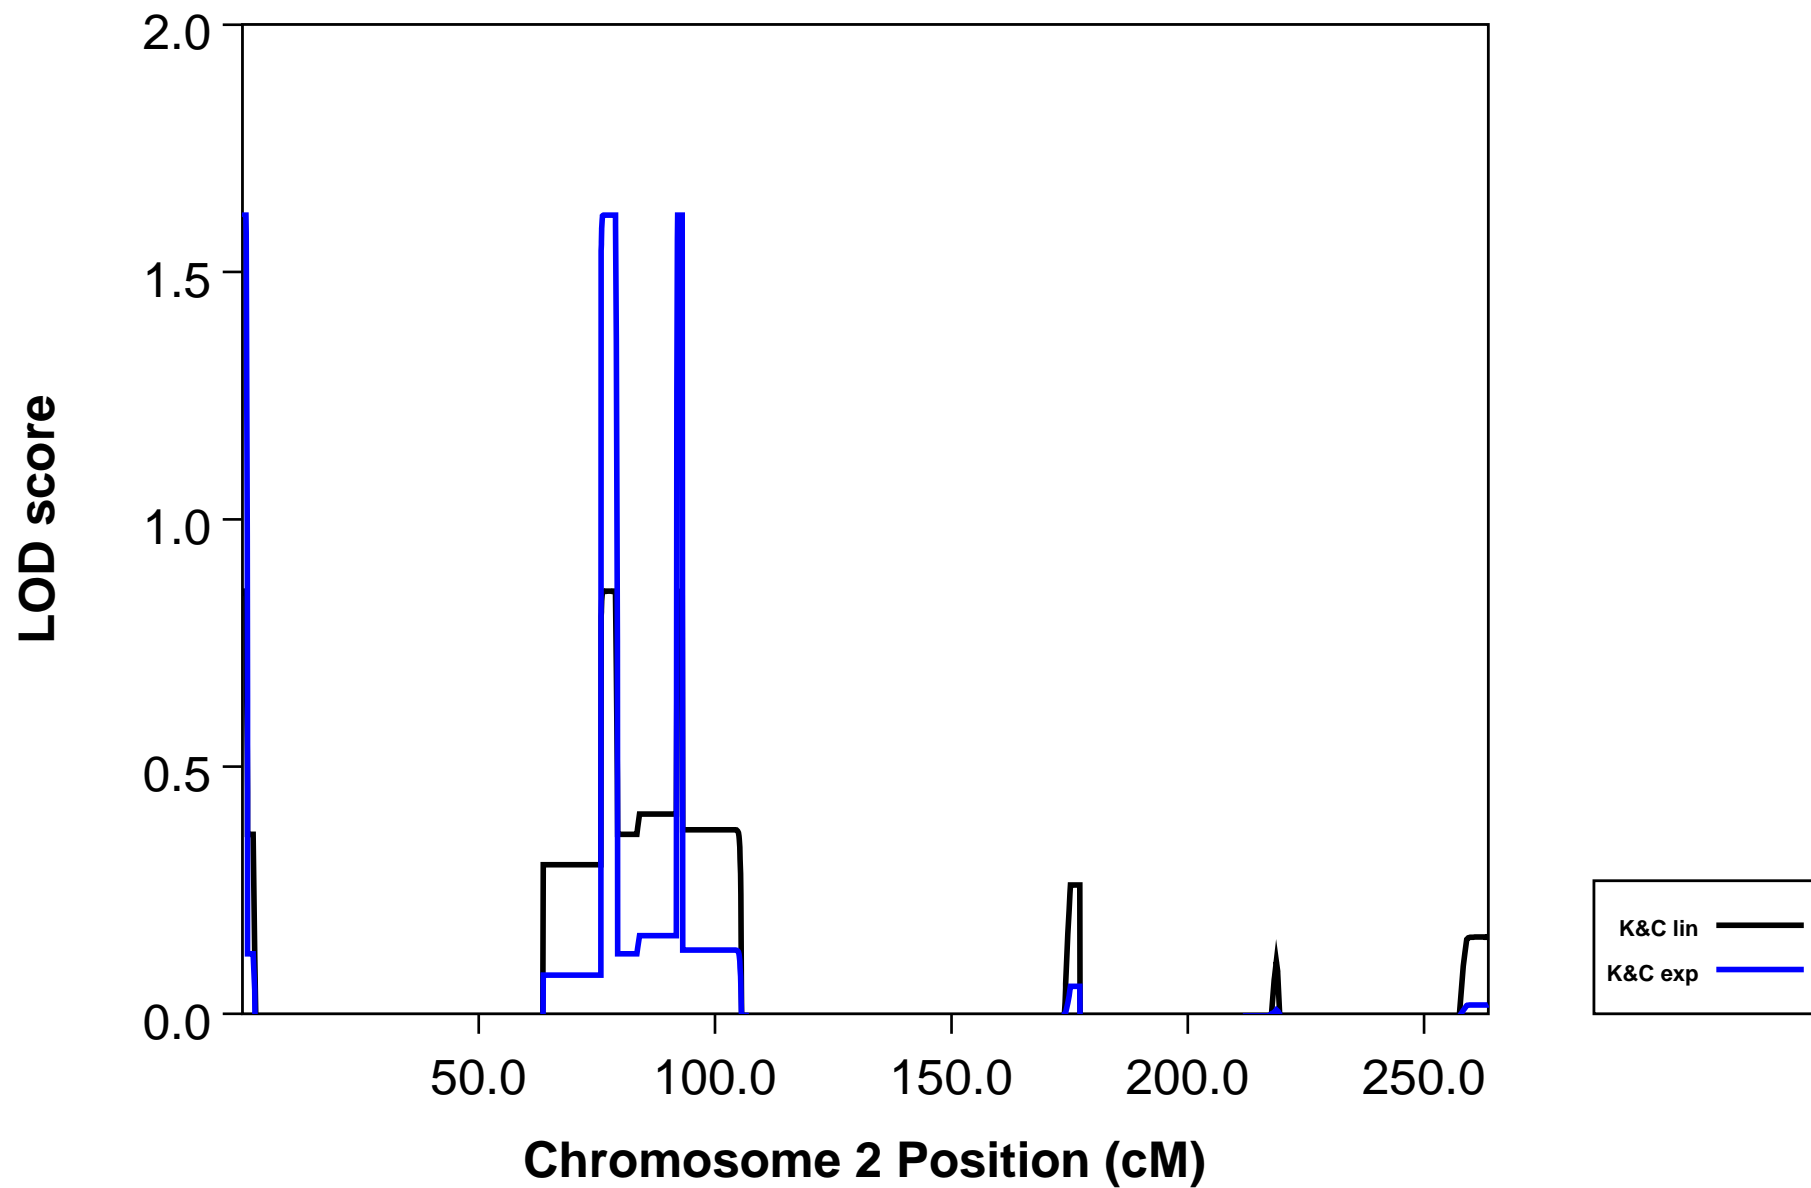

# AFFSTAT [ALL]

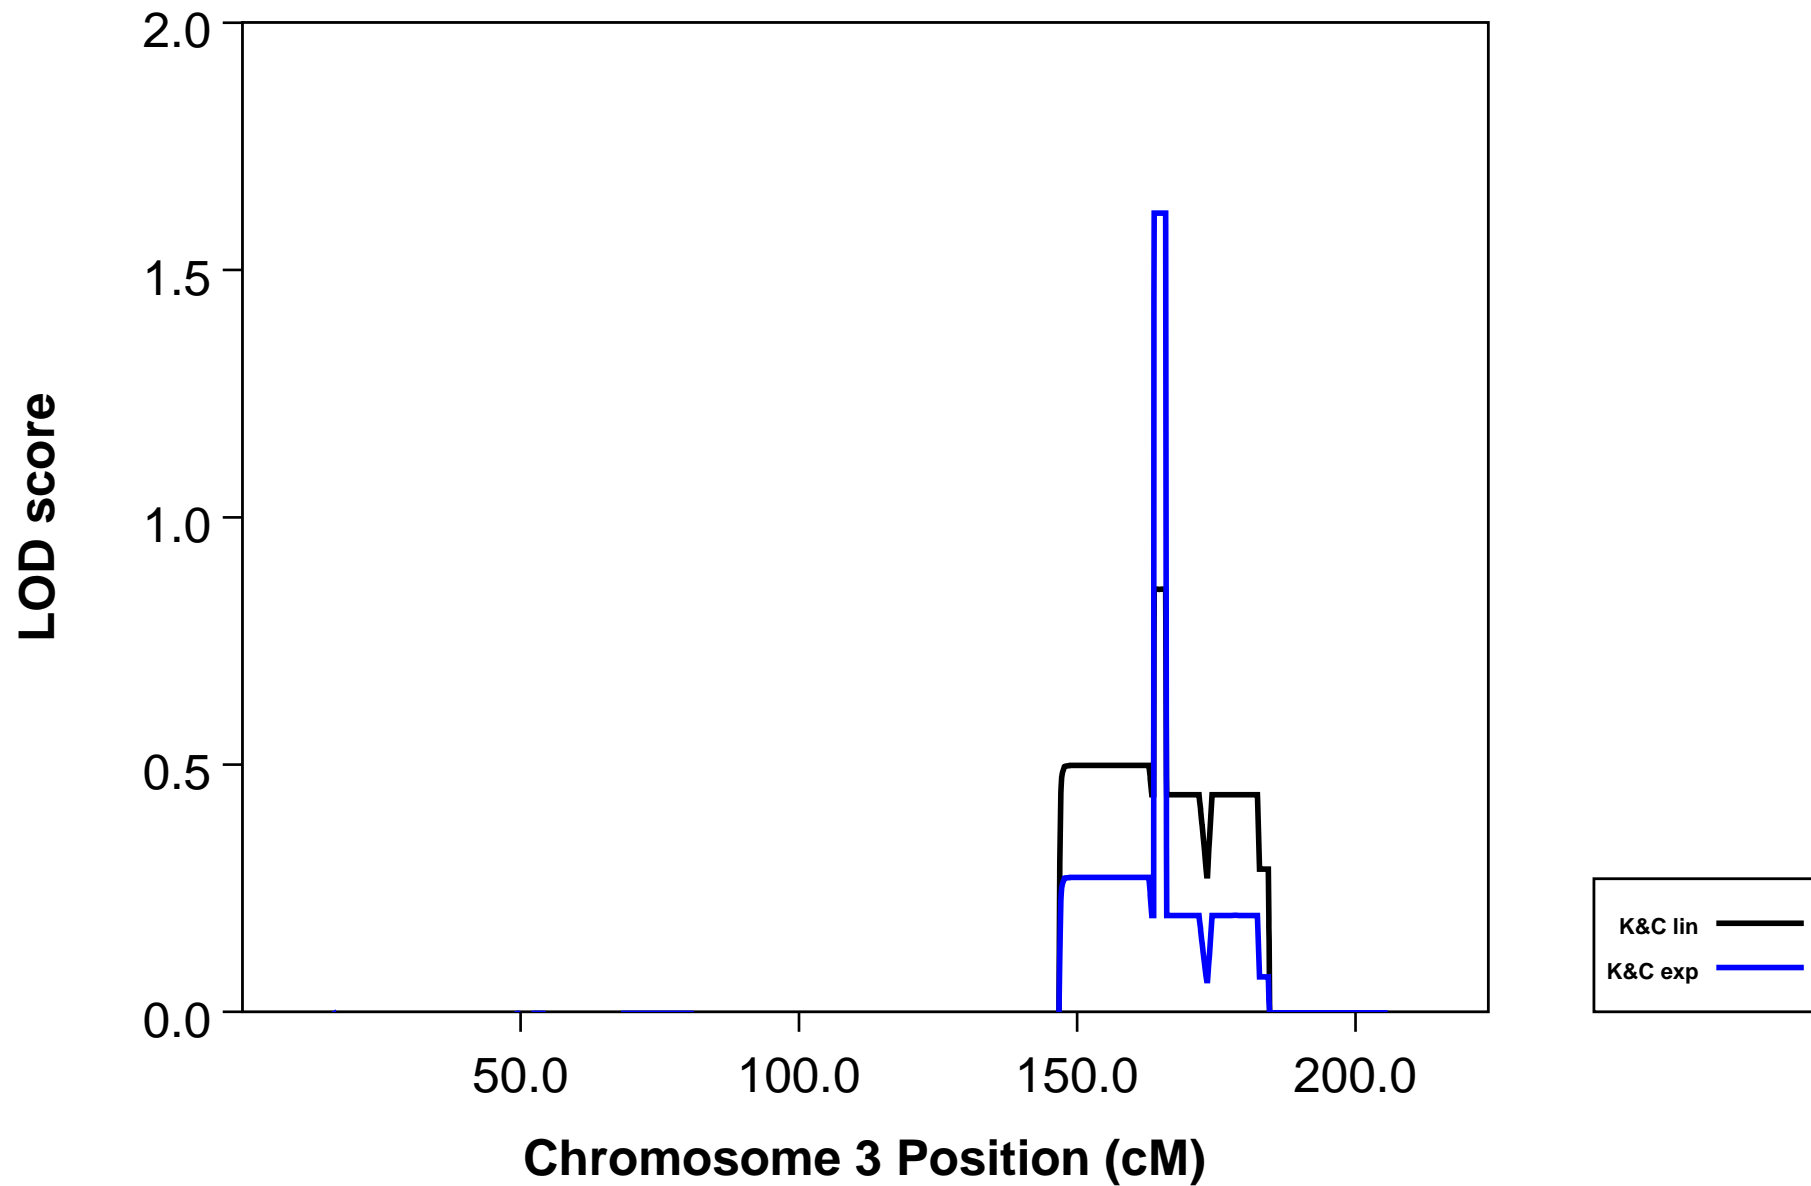

# AFFSTAT [ALL]

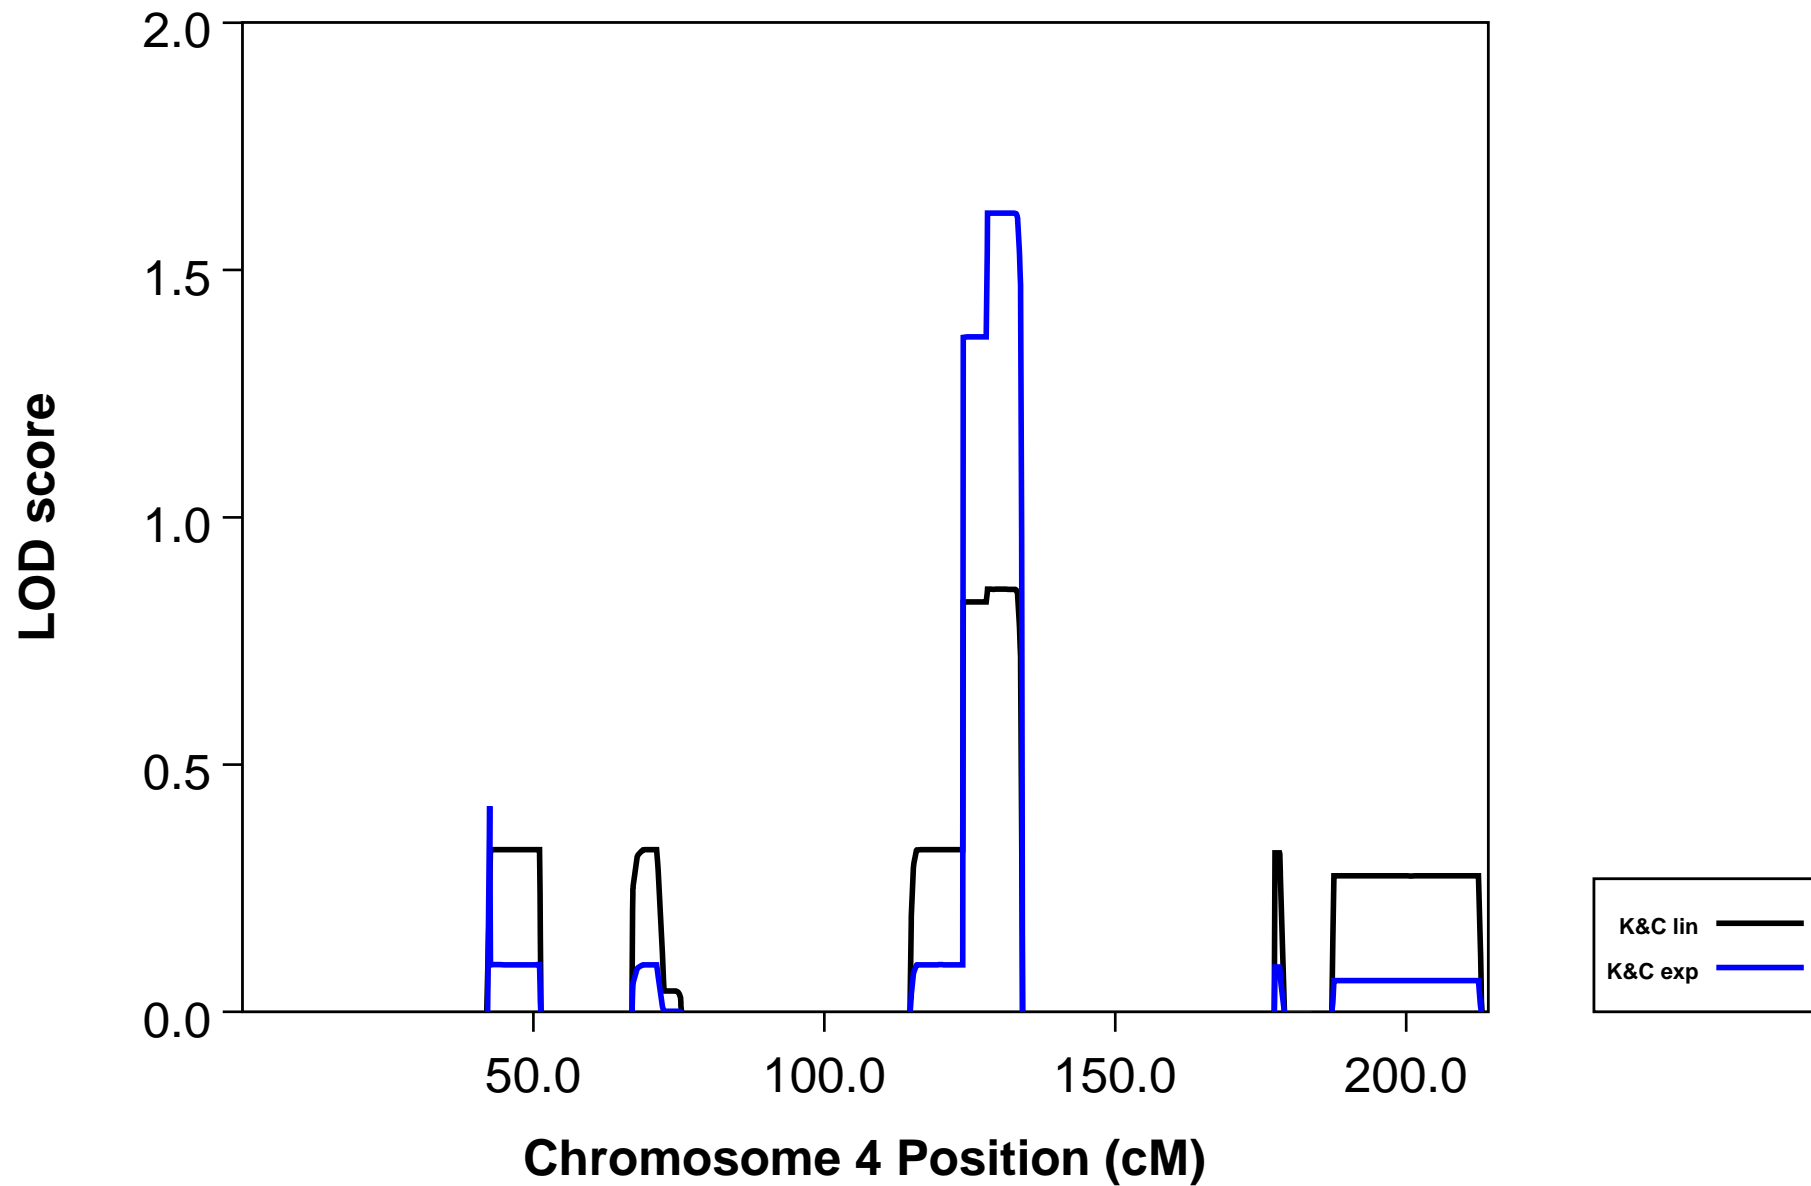



# AFFSTAT [ALL]

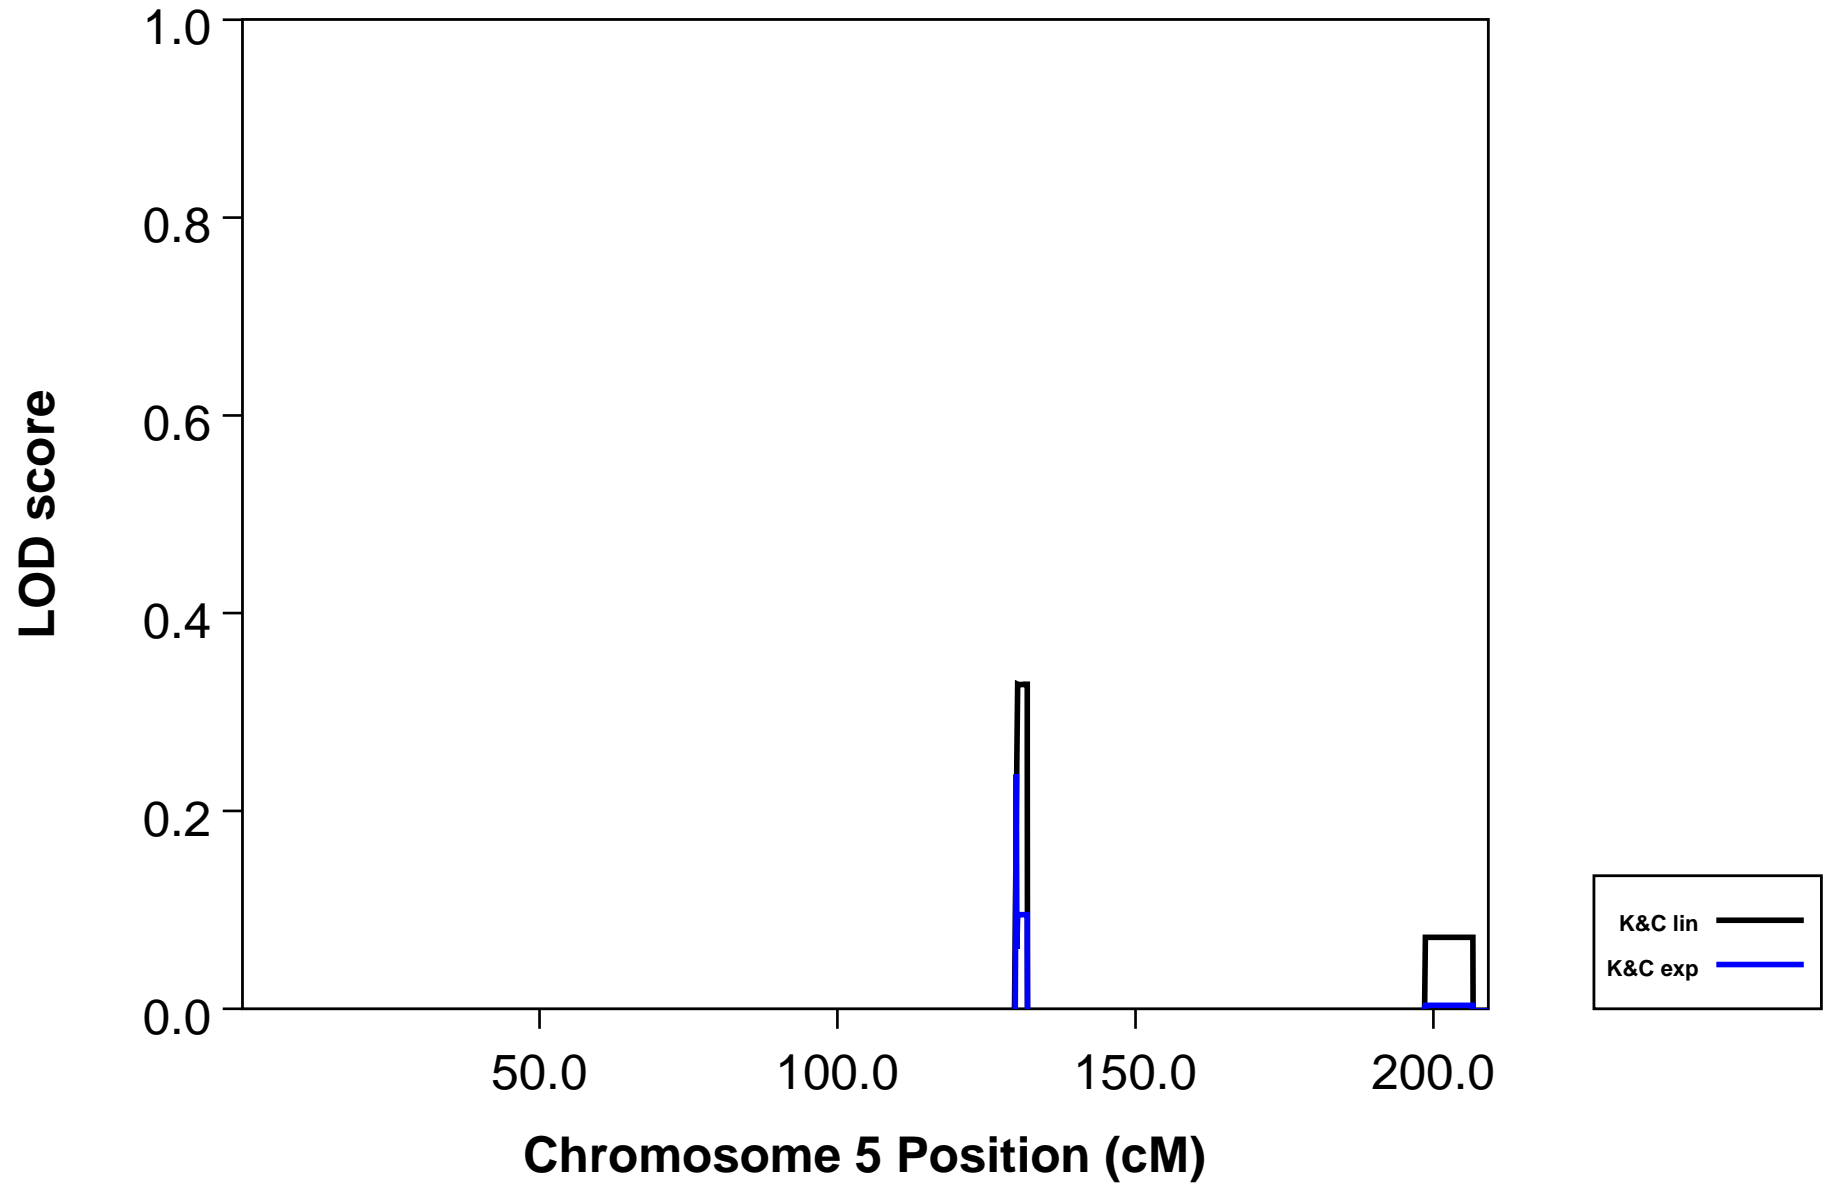

# AFFSTAT [ALL]

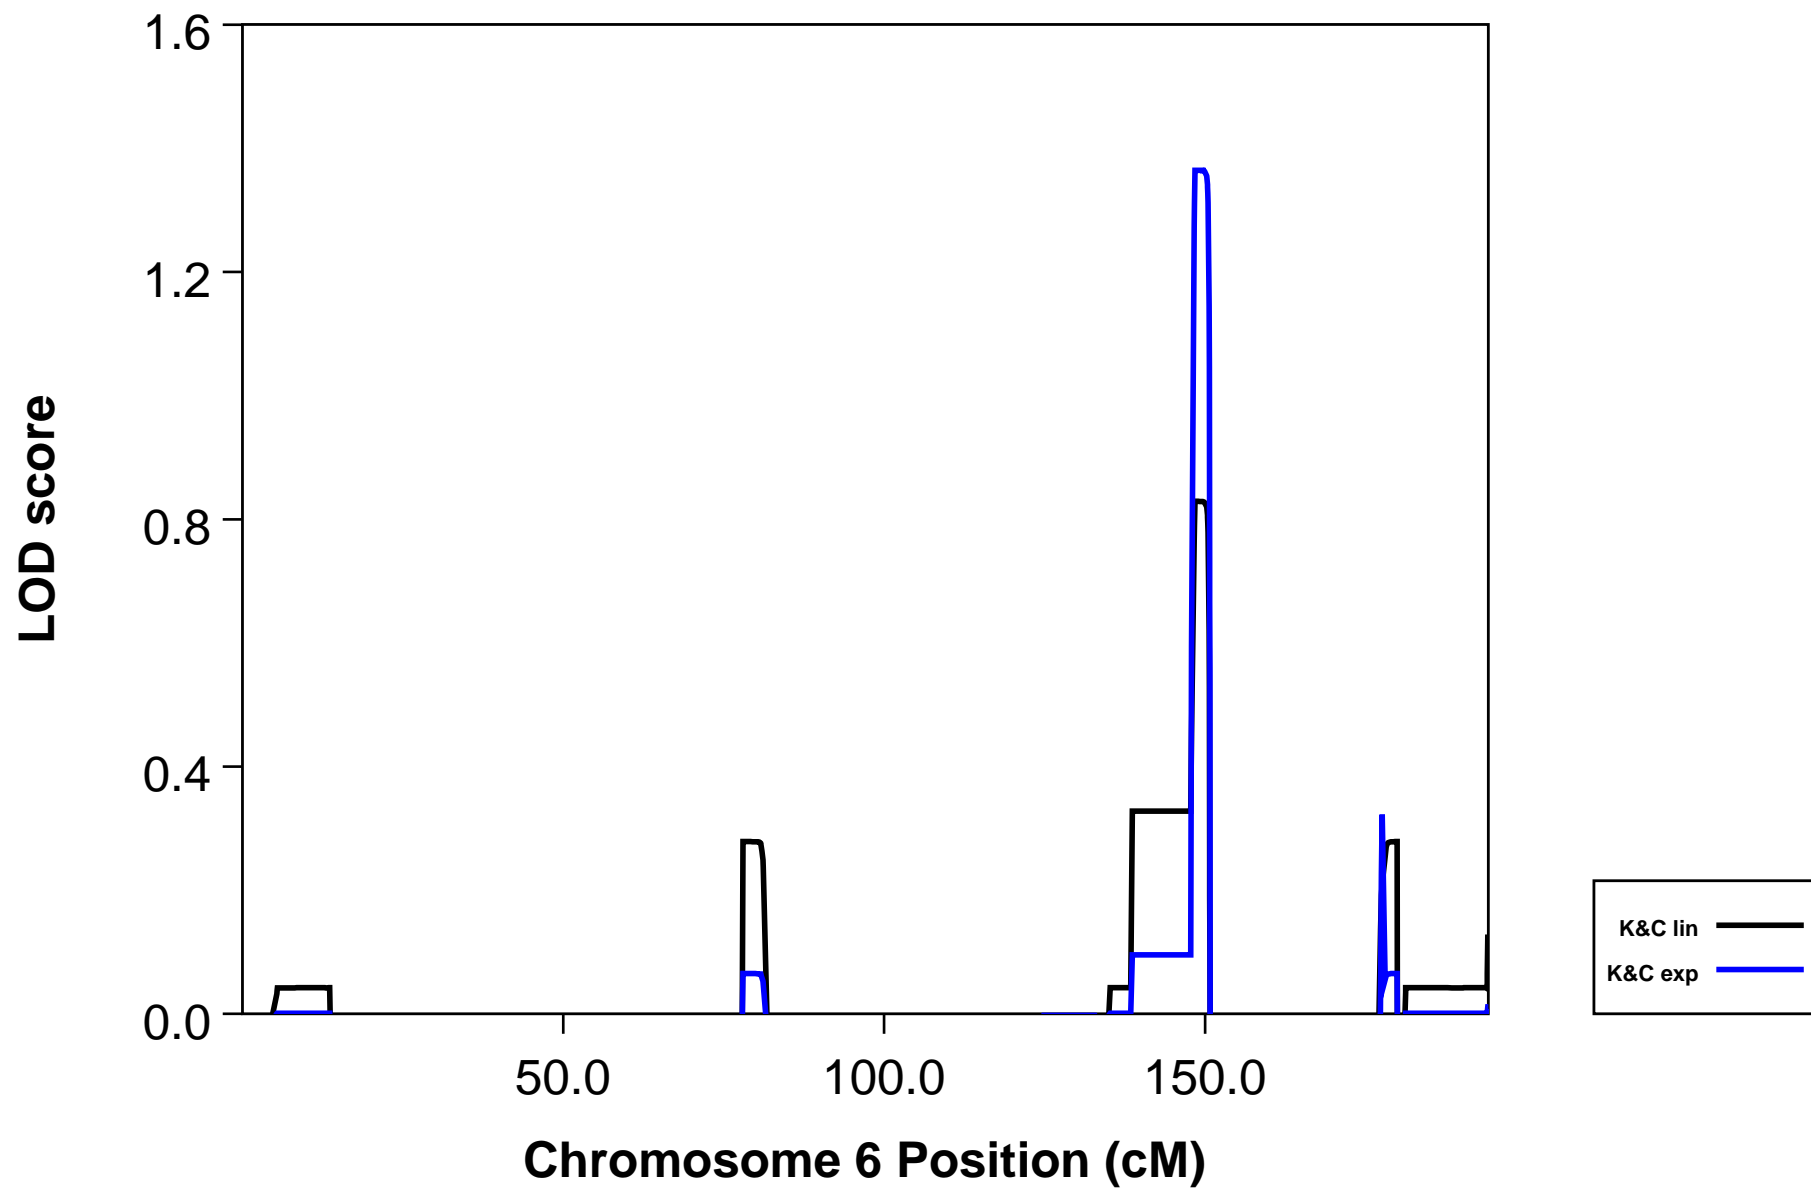

# AFFSTAT [ALL]

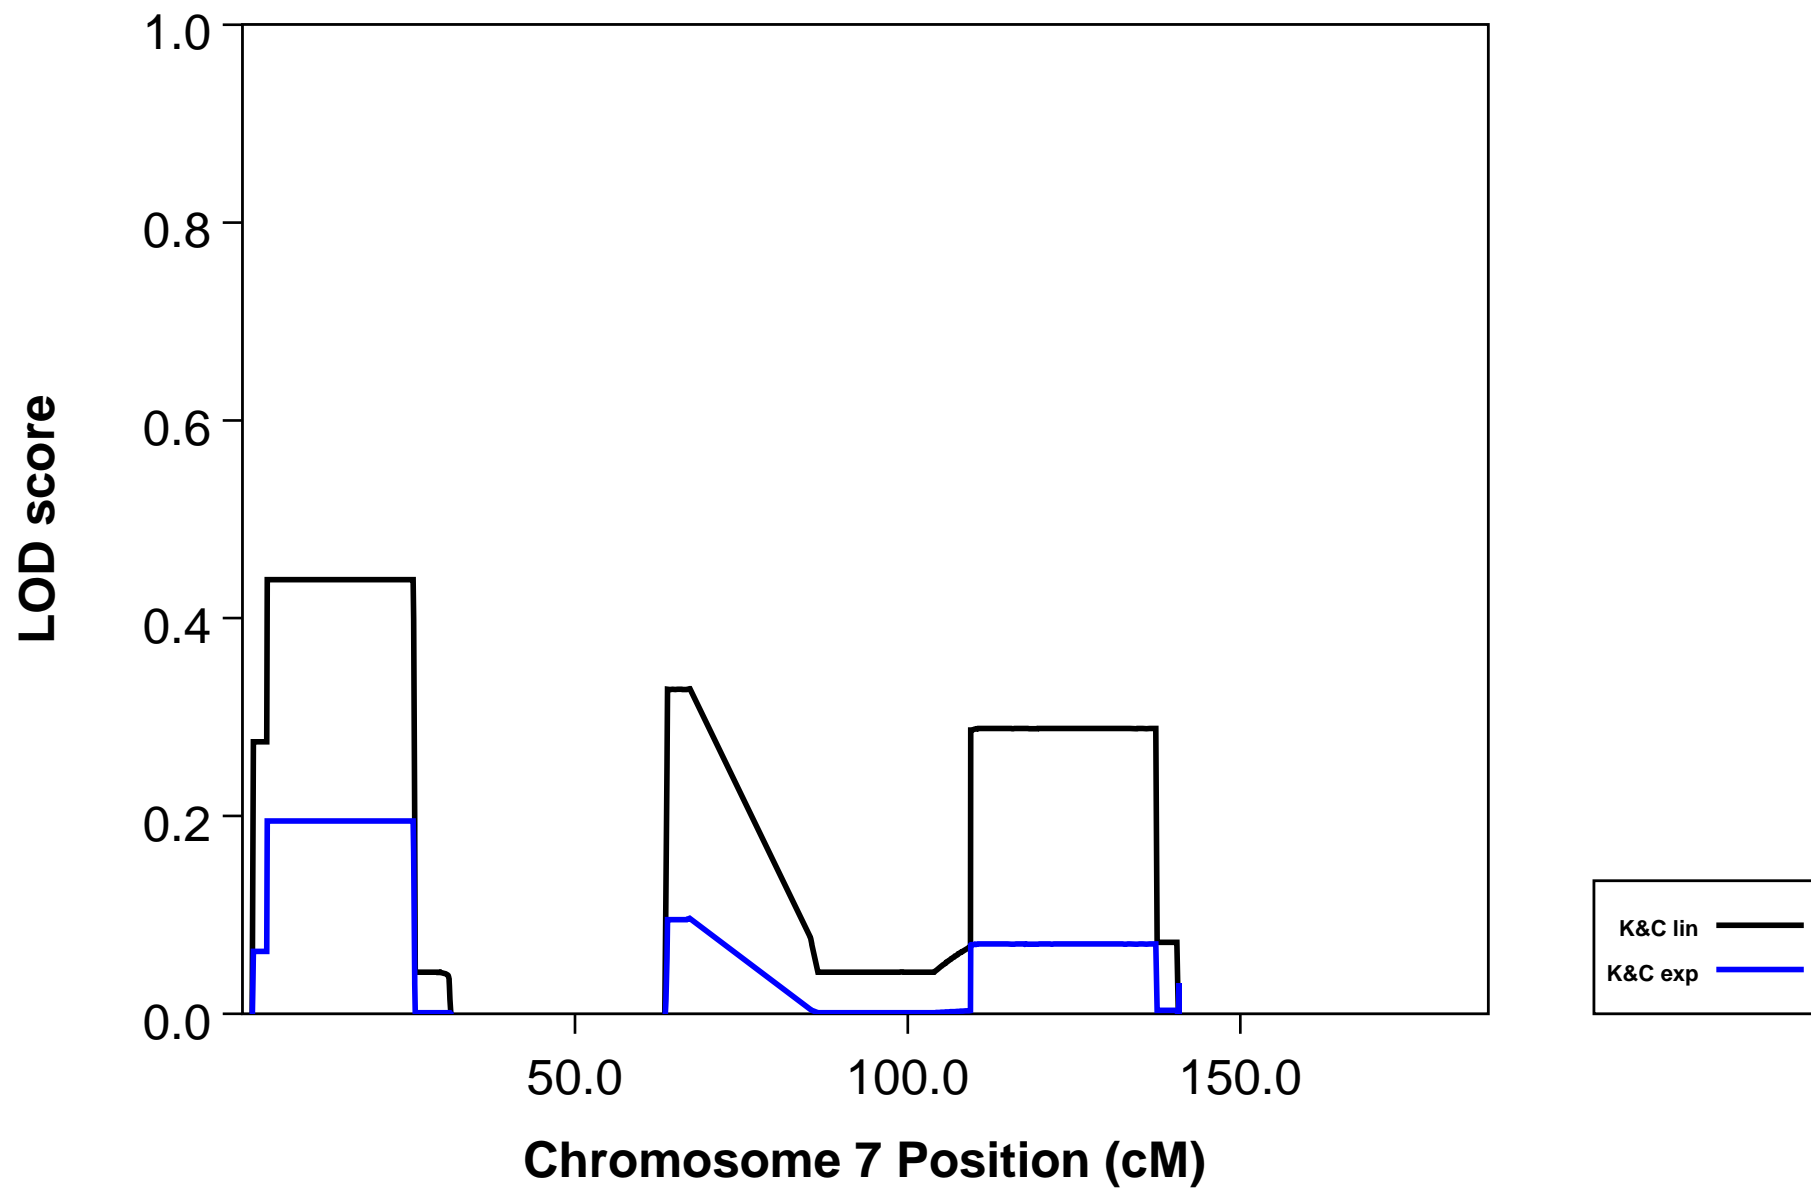

# AFFSTAT [ALL]

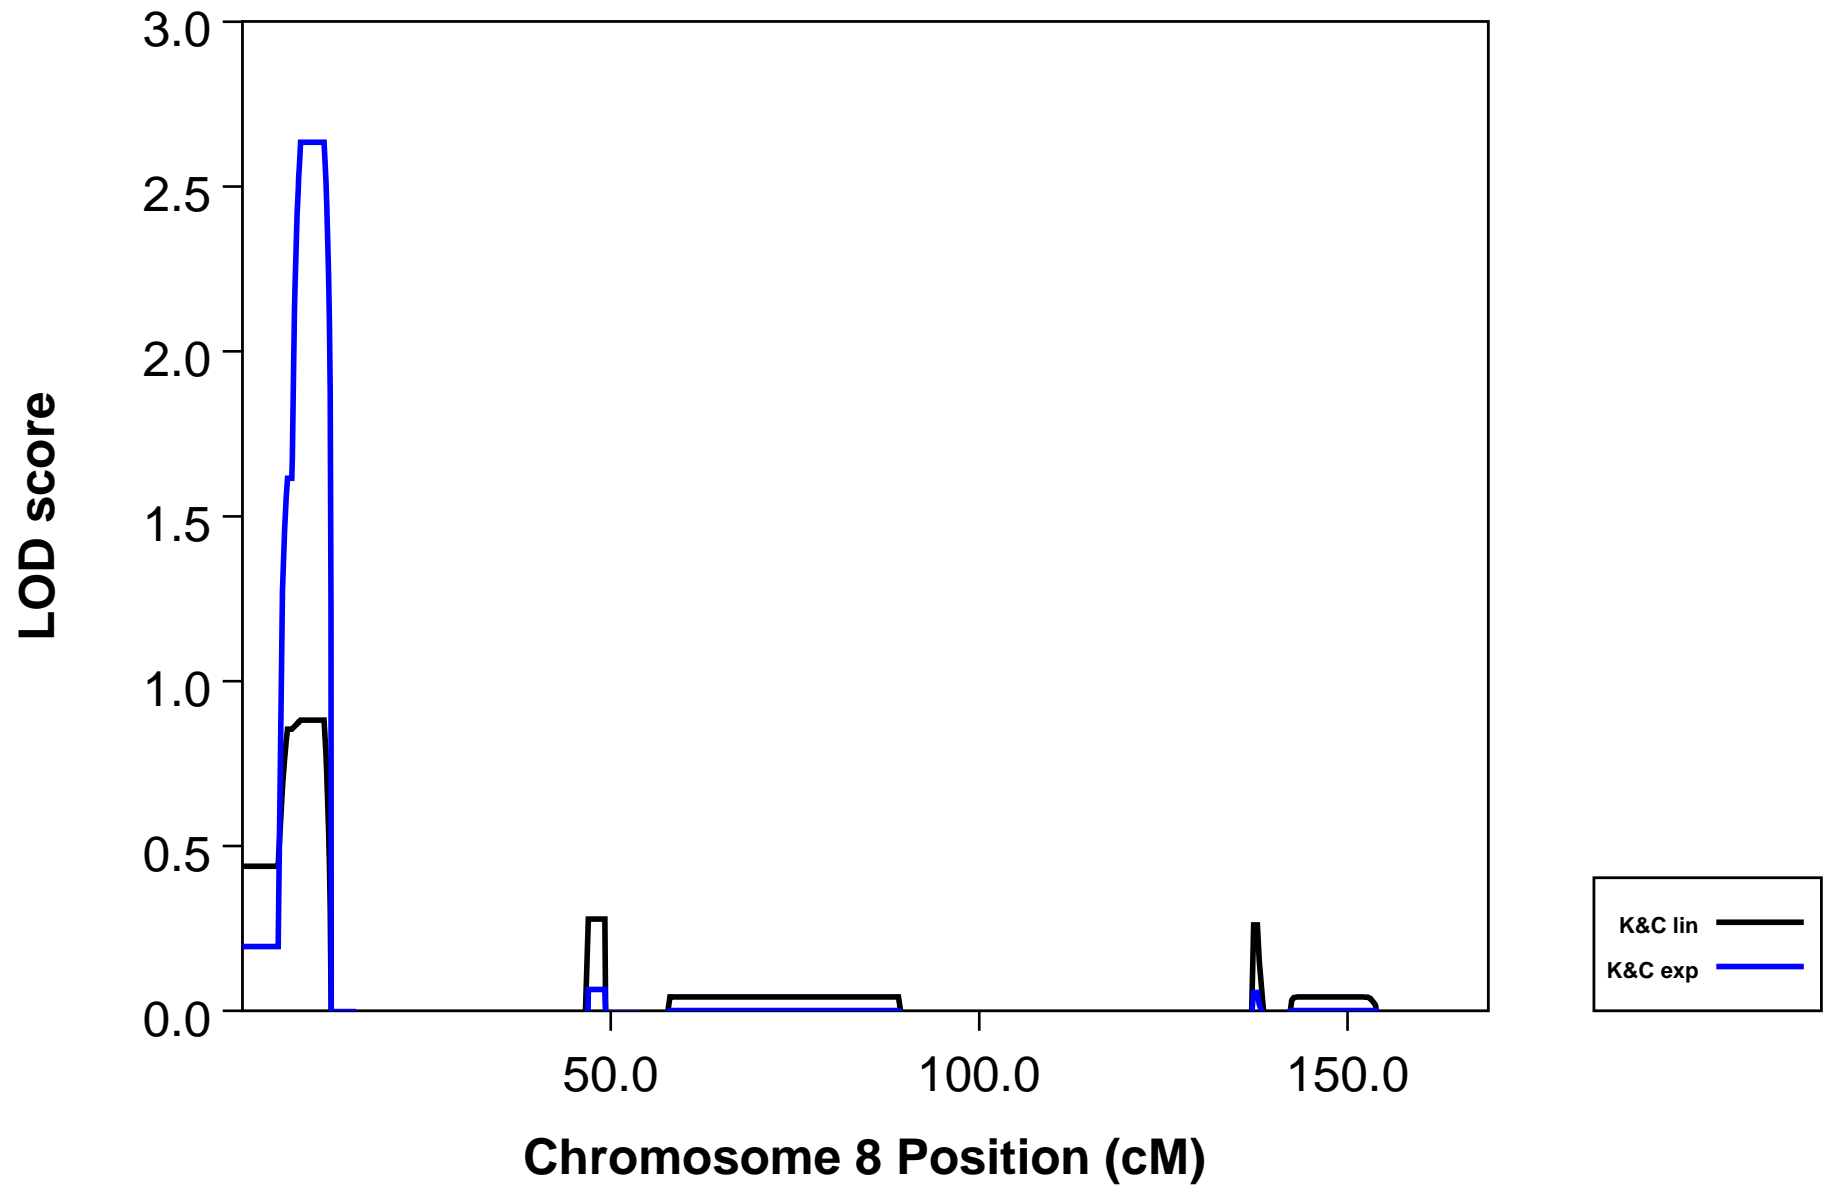

# AFFSTAT [ALL]

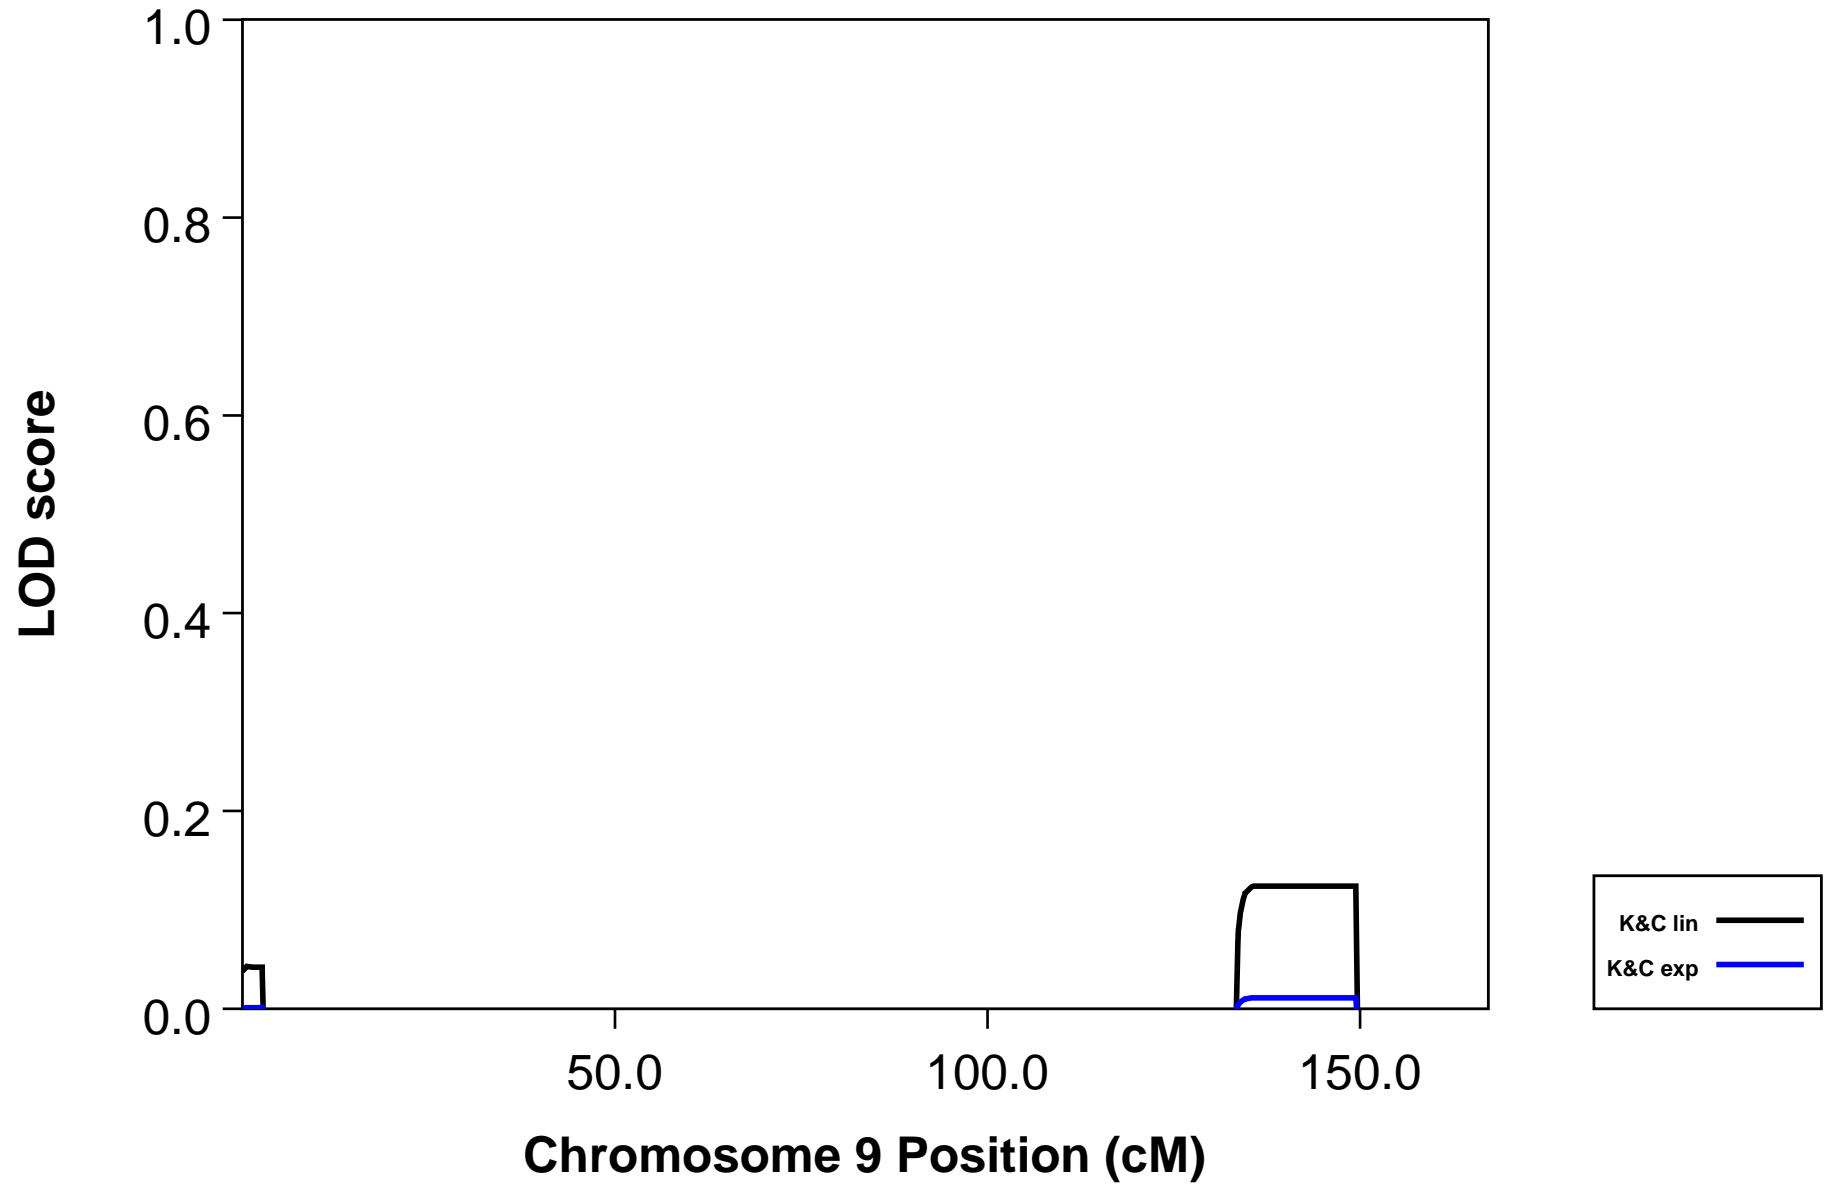

# AFFSTAT [ALL]

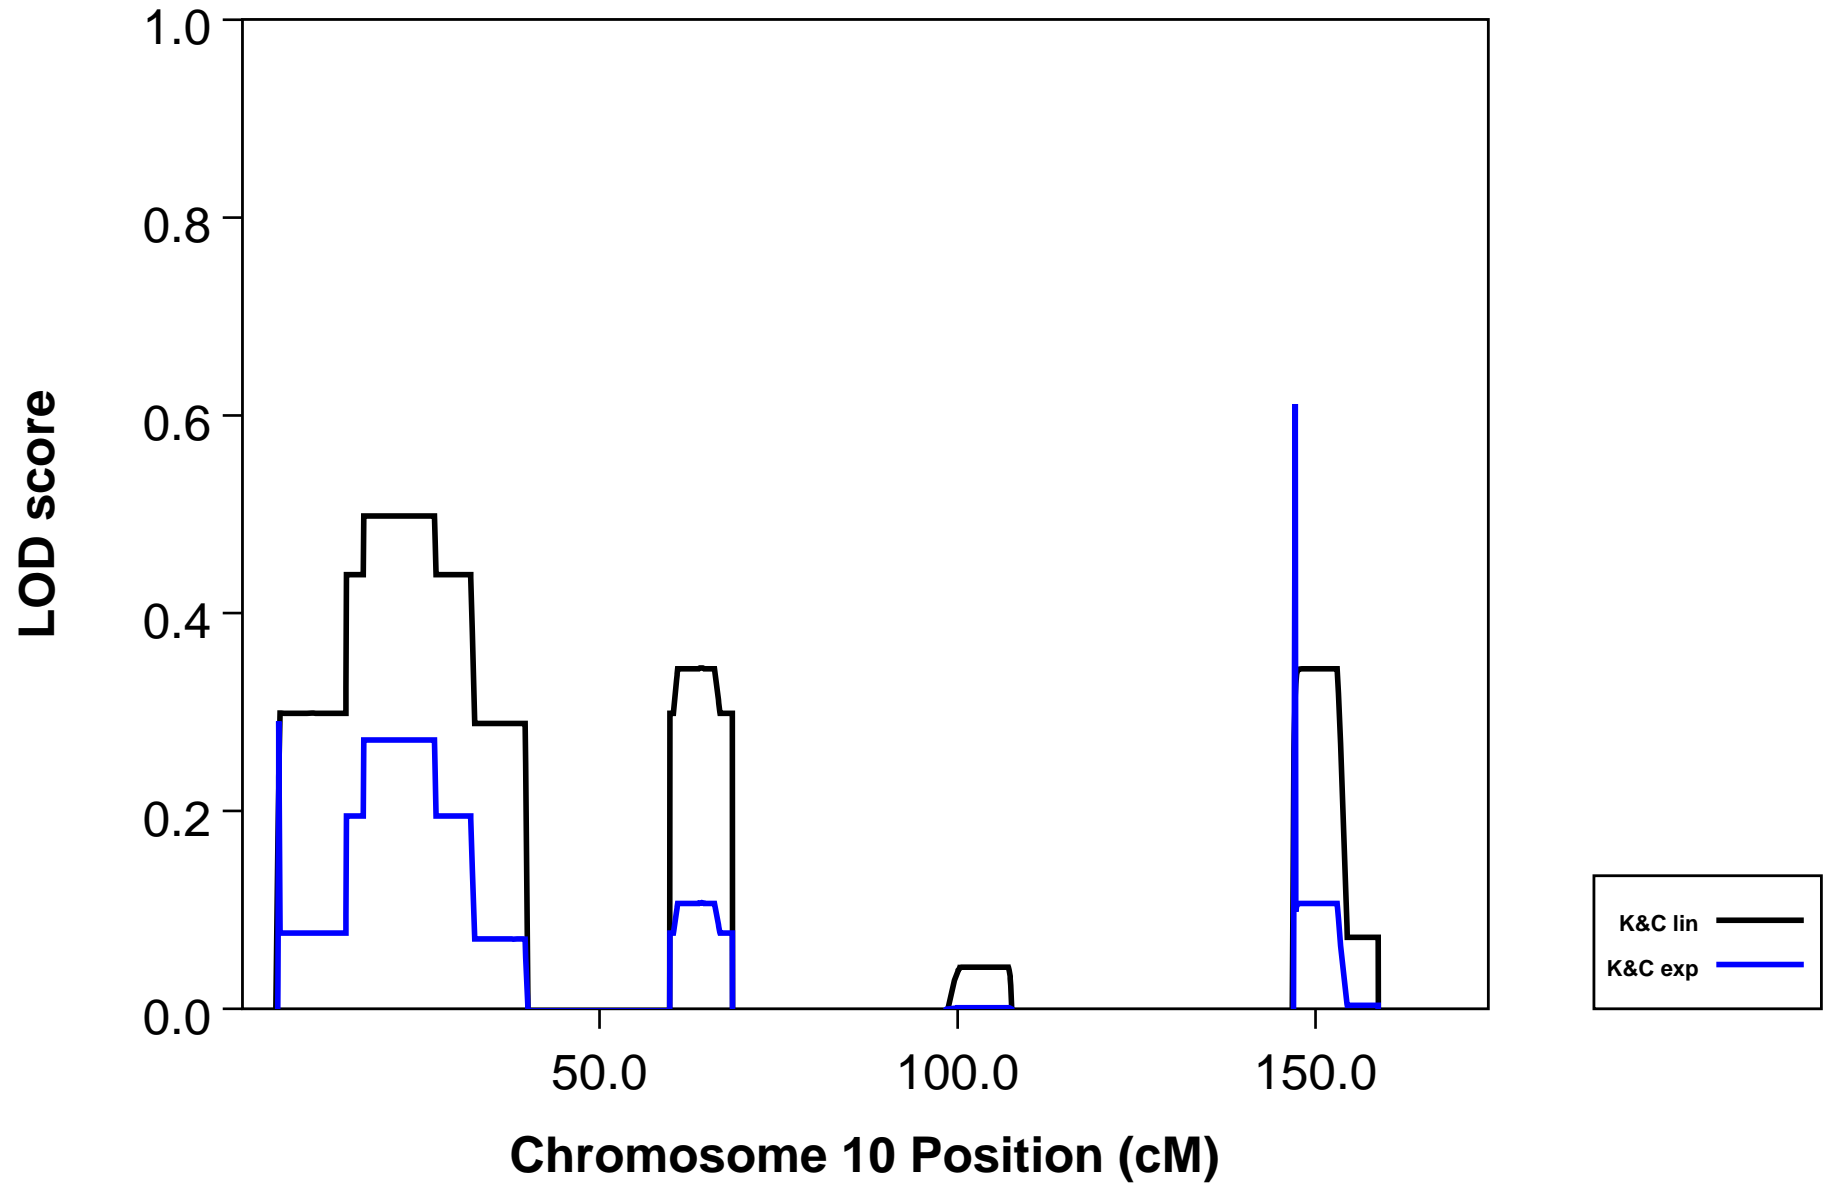

# AFFSTAT [ALL]

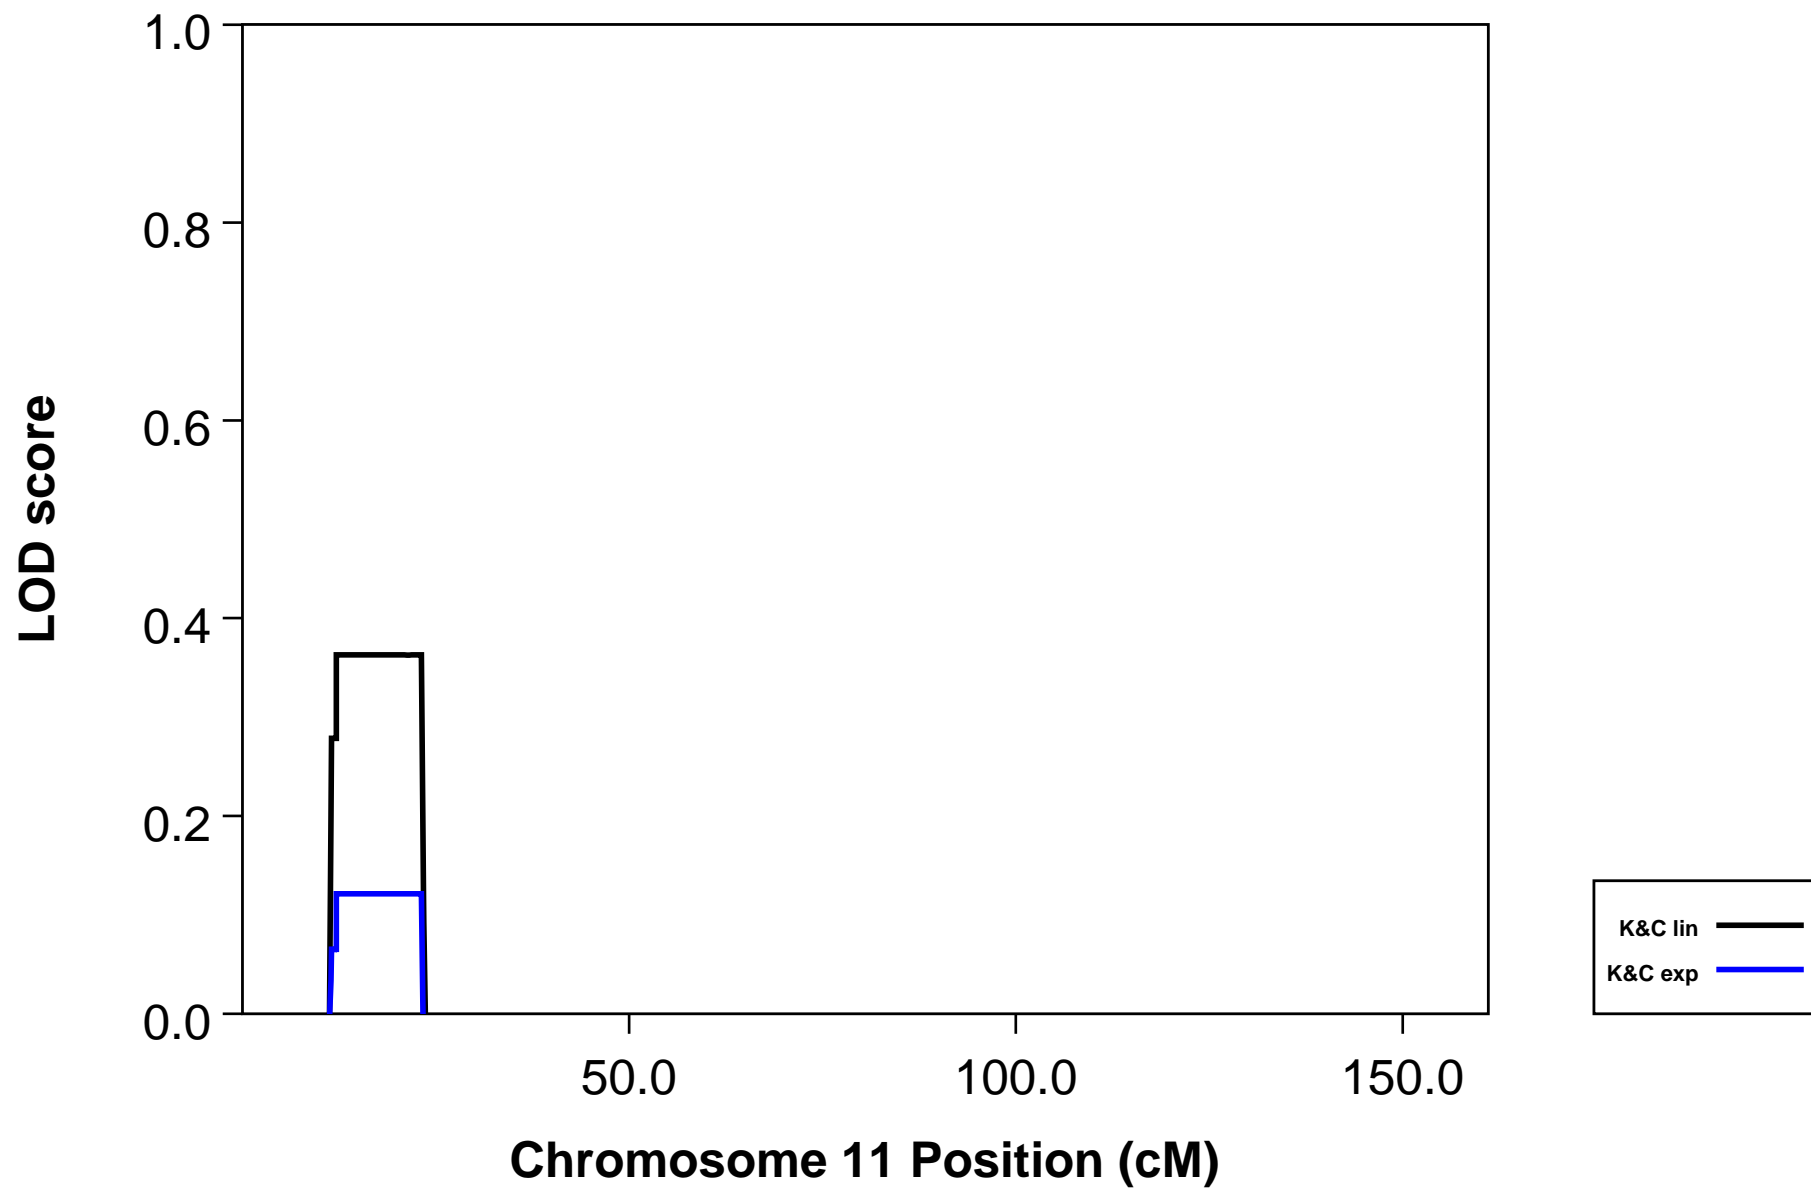

# AFFSTAT [ALL]

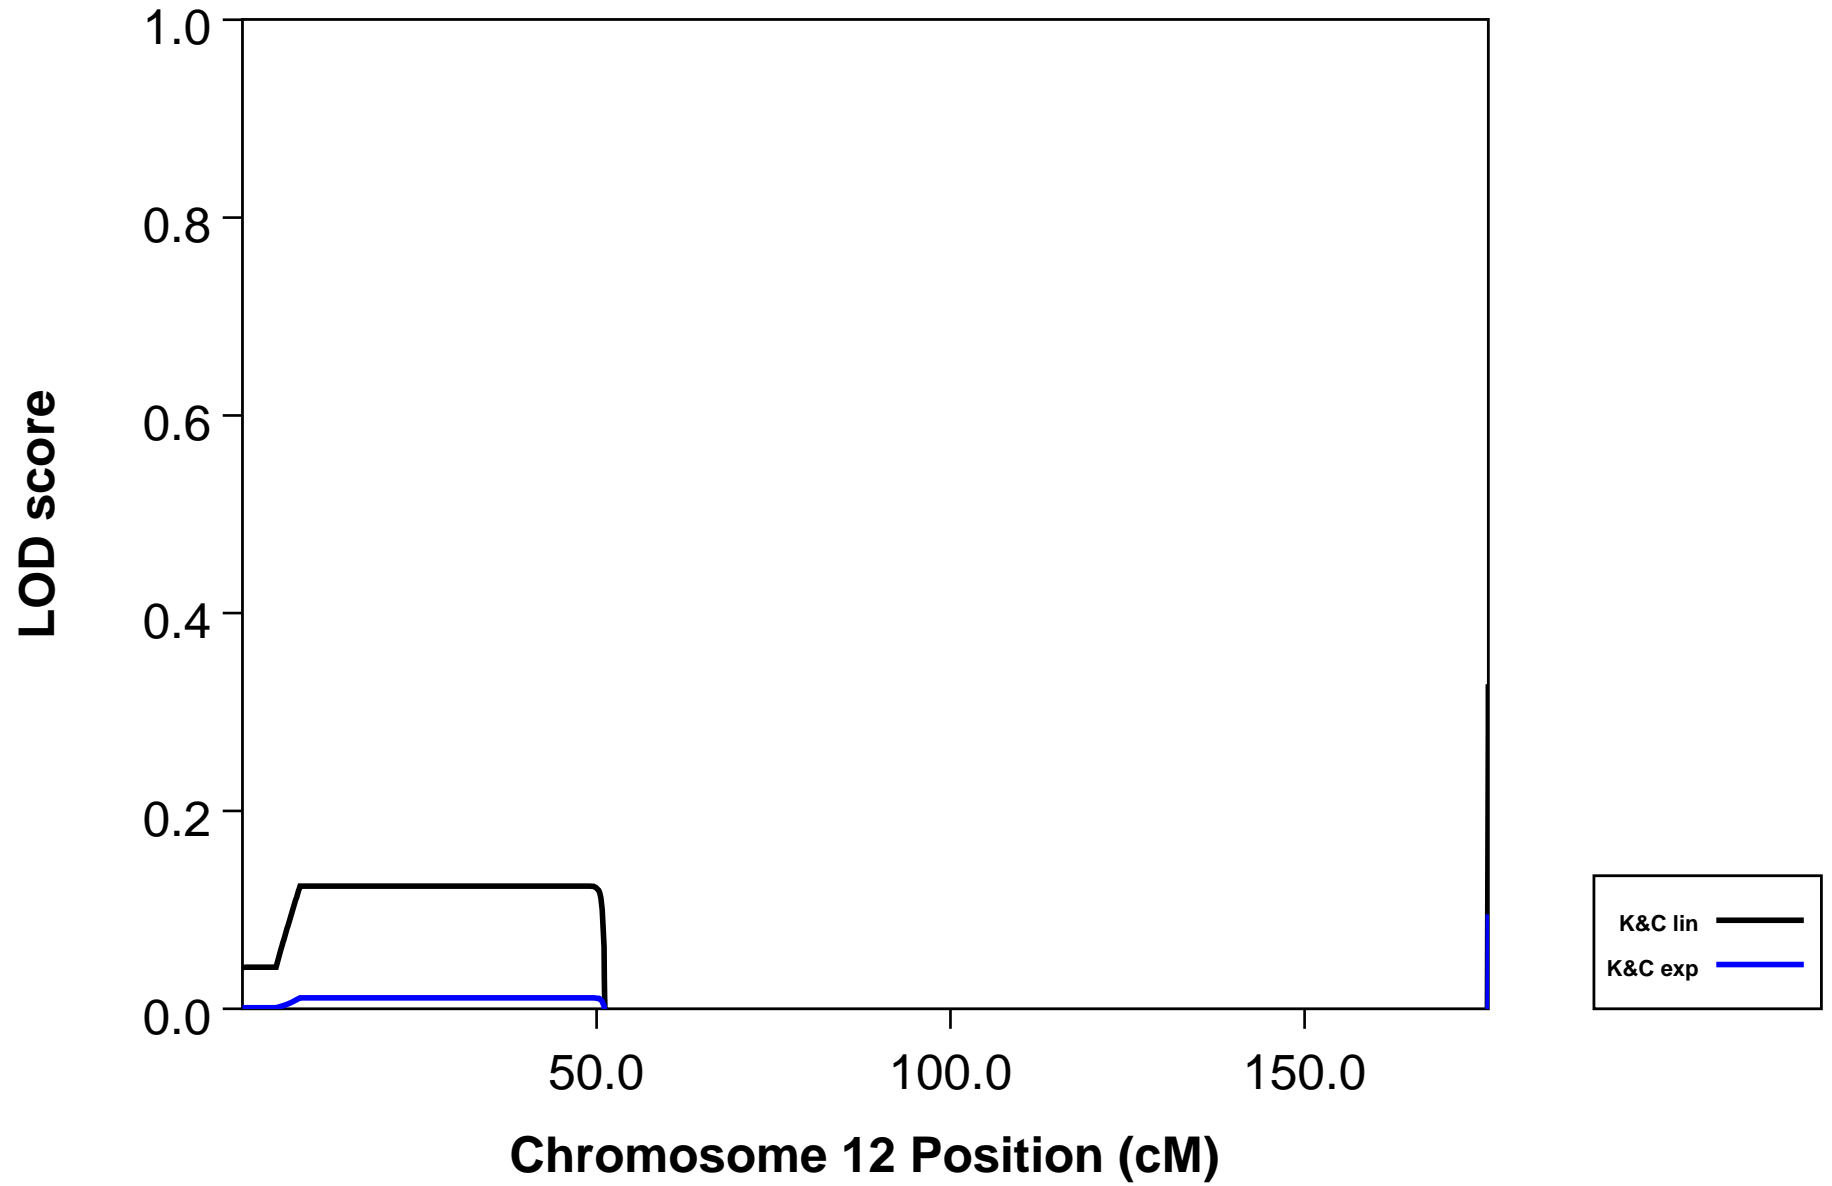



# AFFSTAT [ALL]

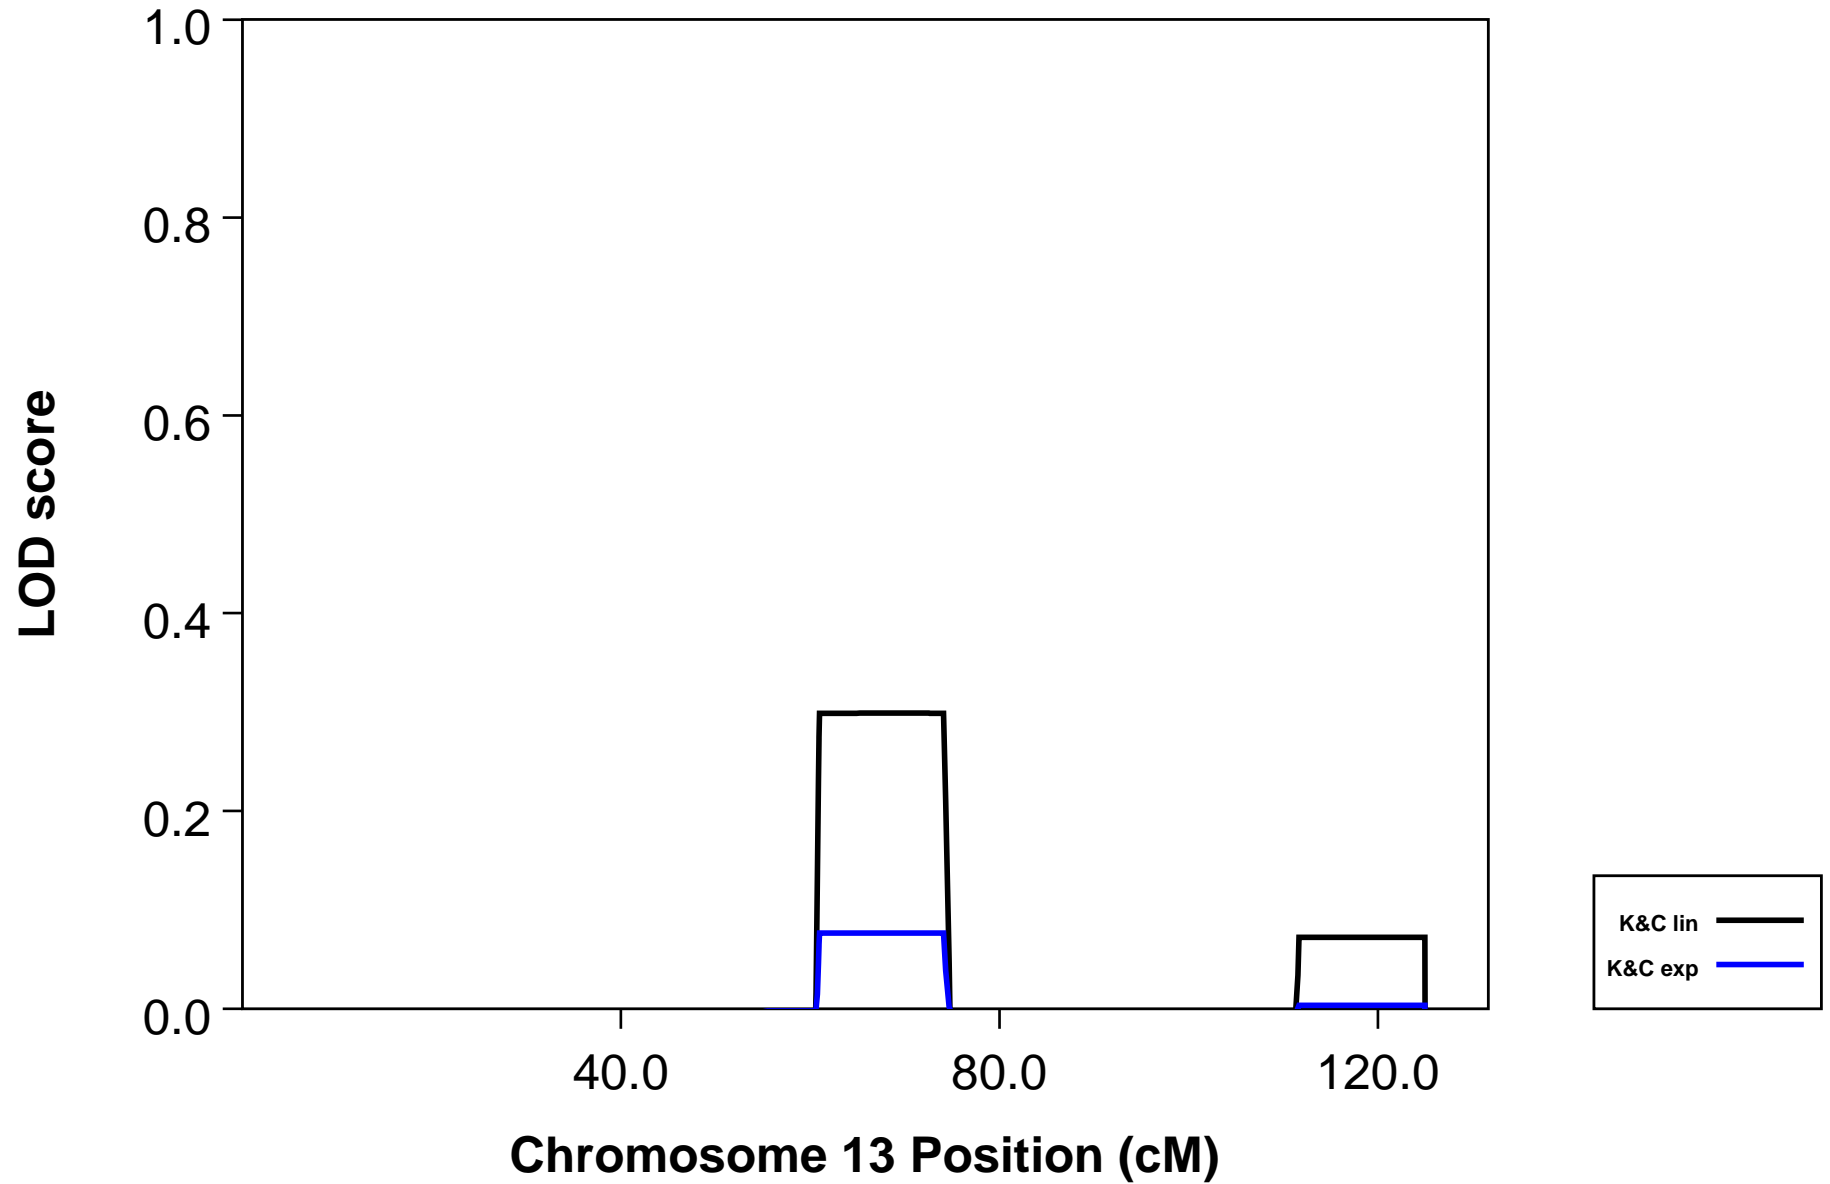

# AFFSTAT [ALL]

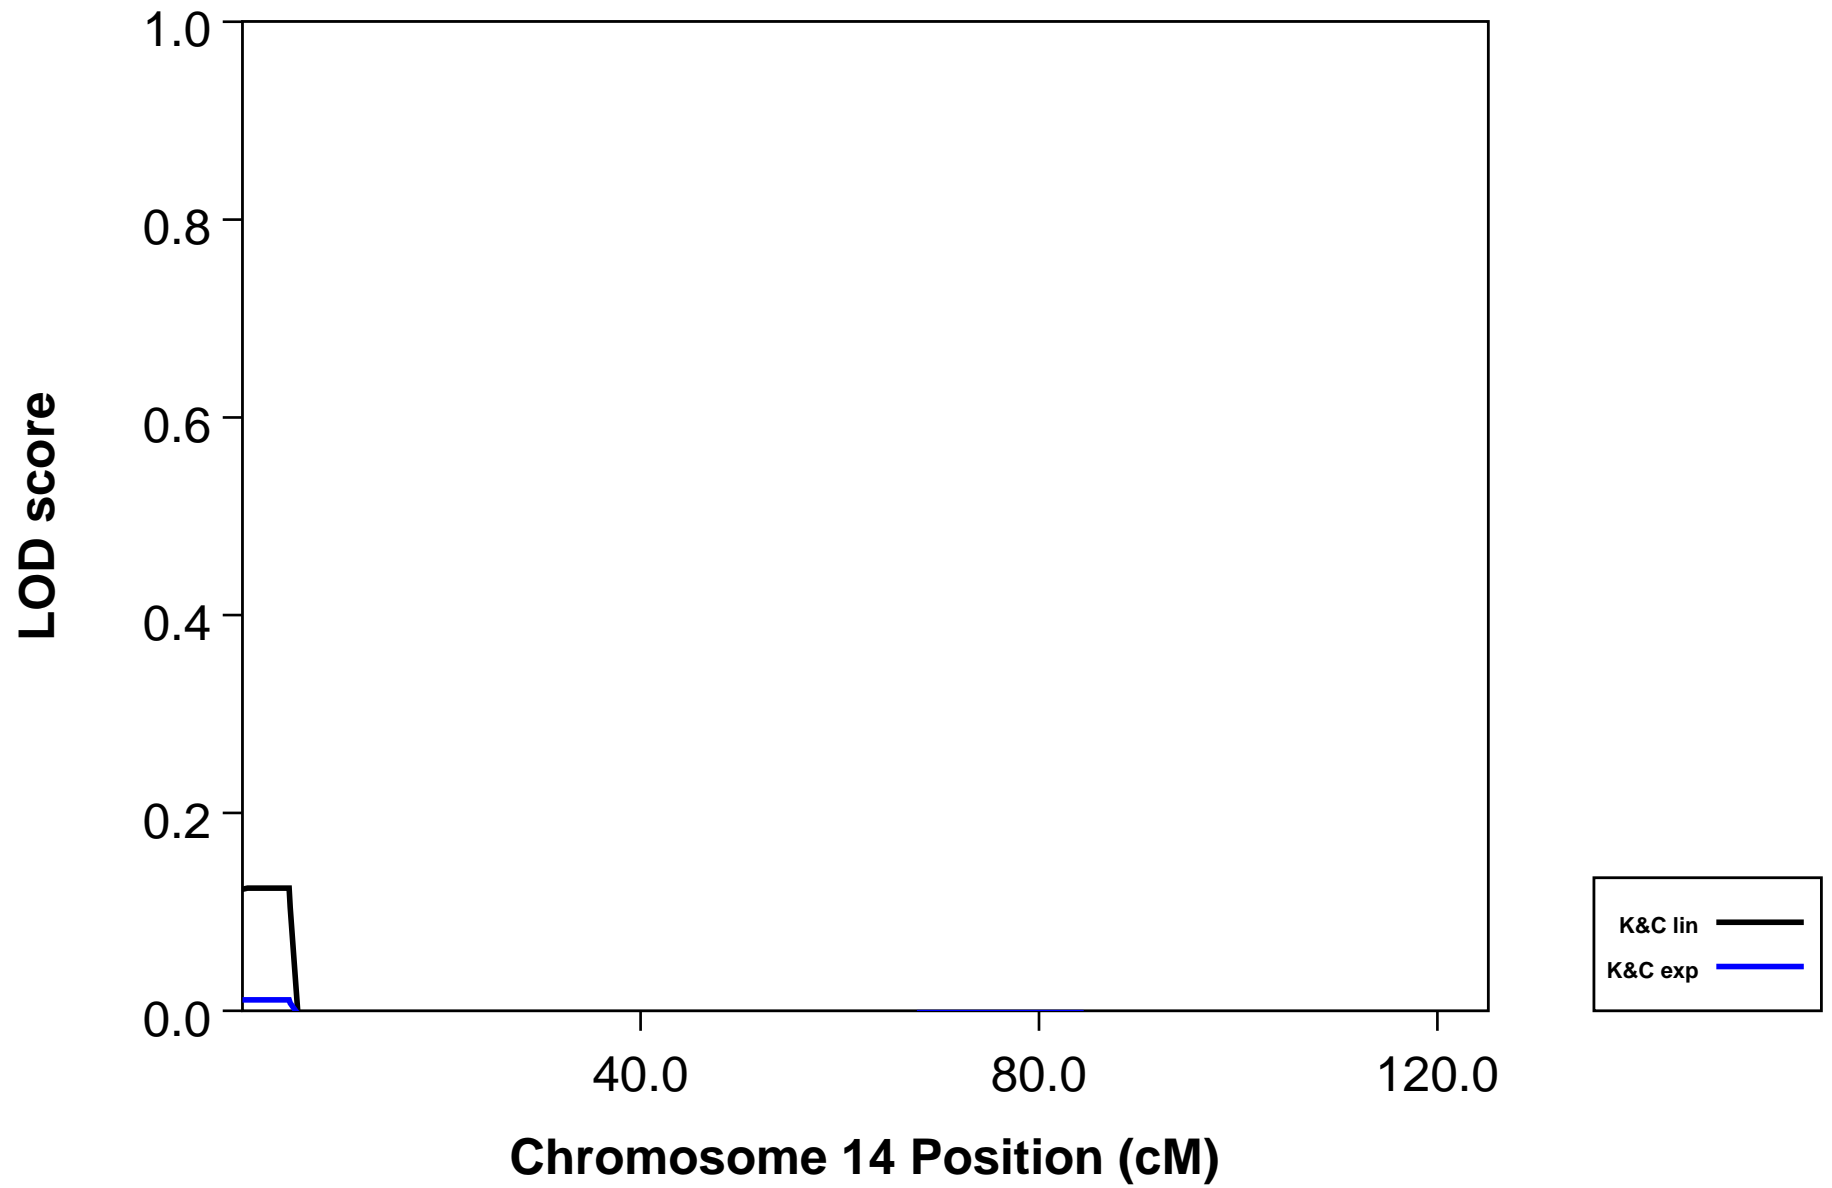

# AFFSTAT [ALL]

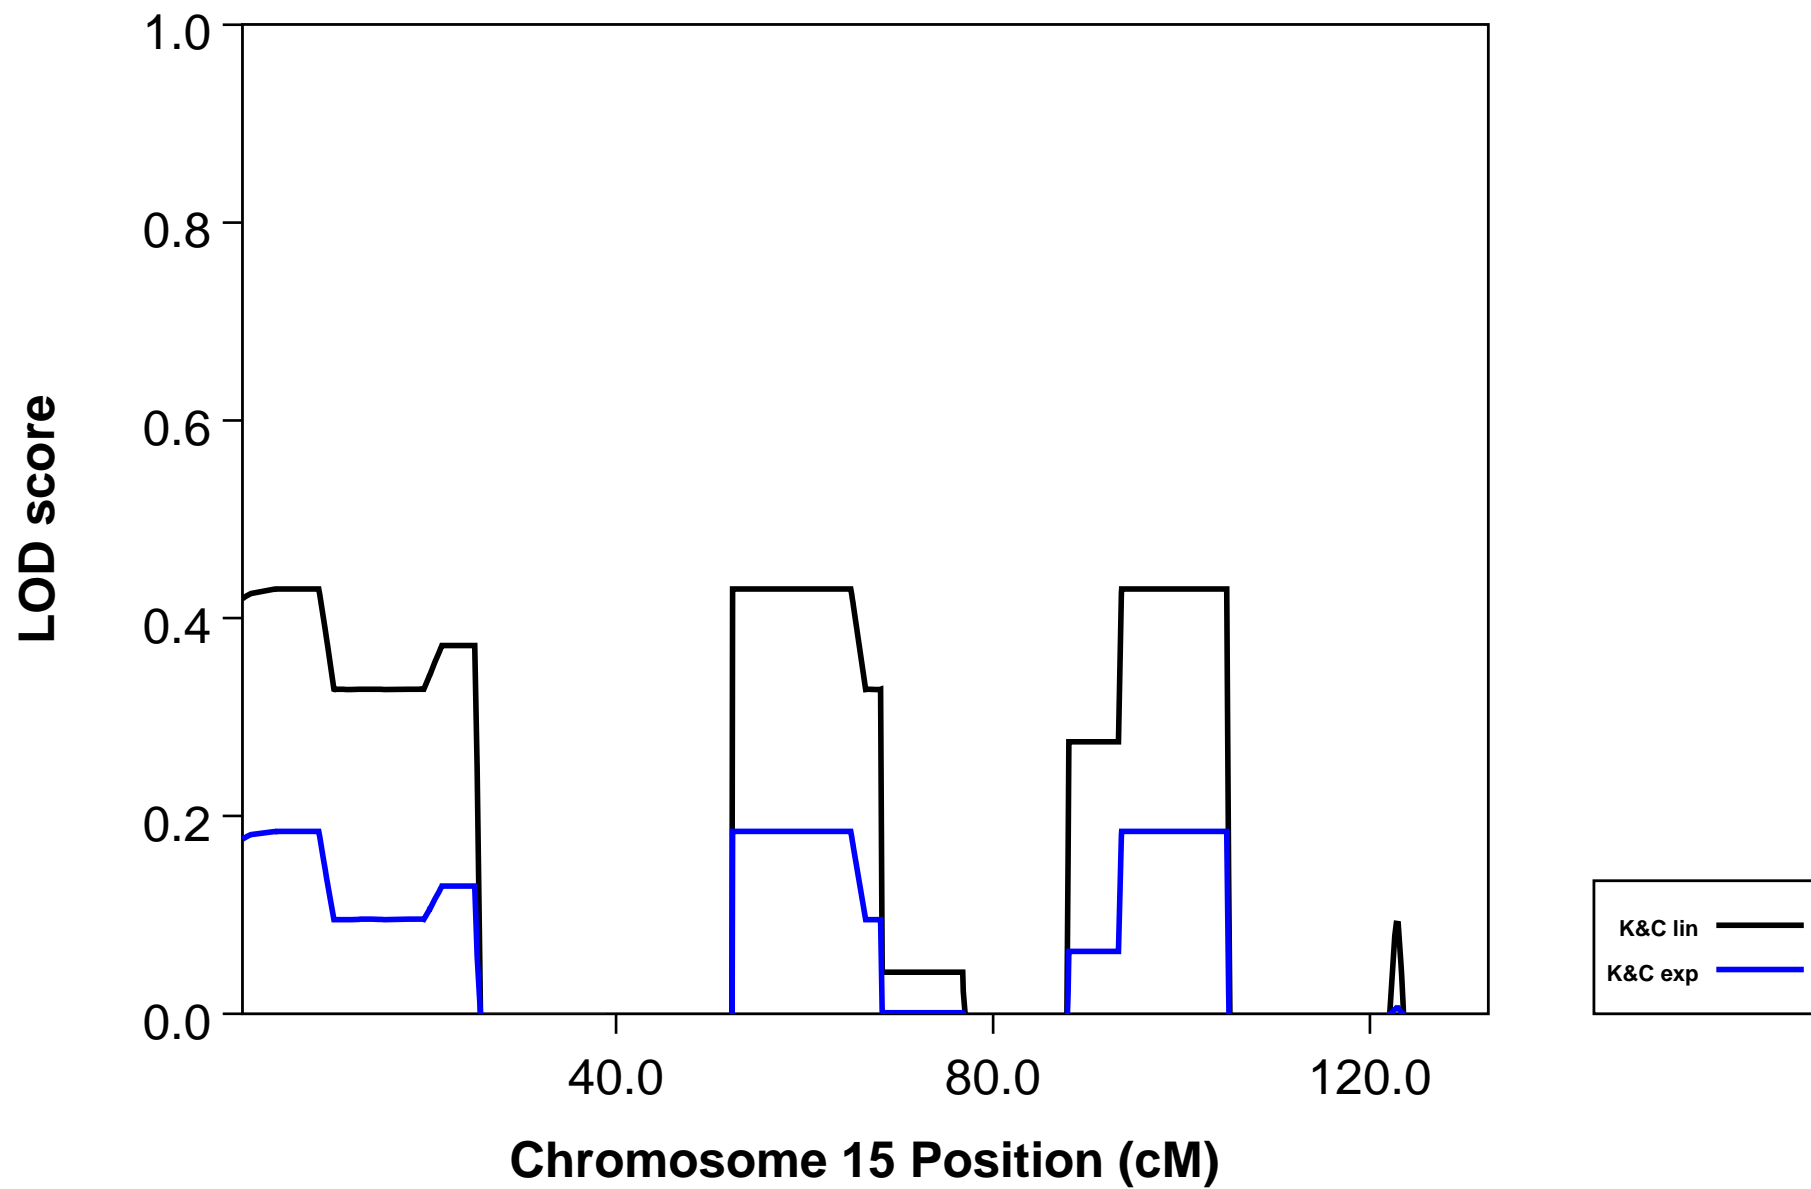

# AFFSTAT [ALL]

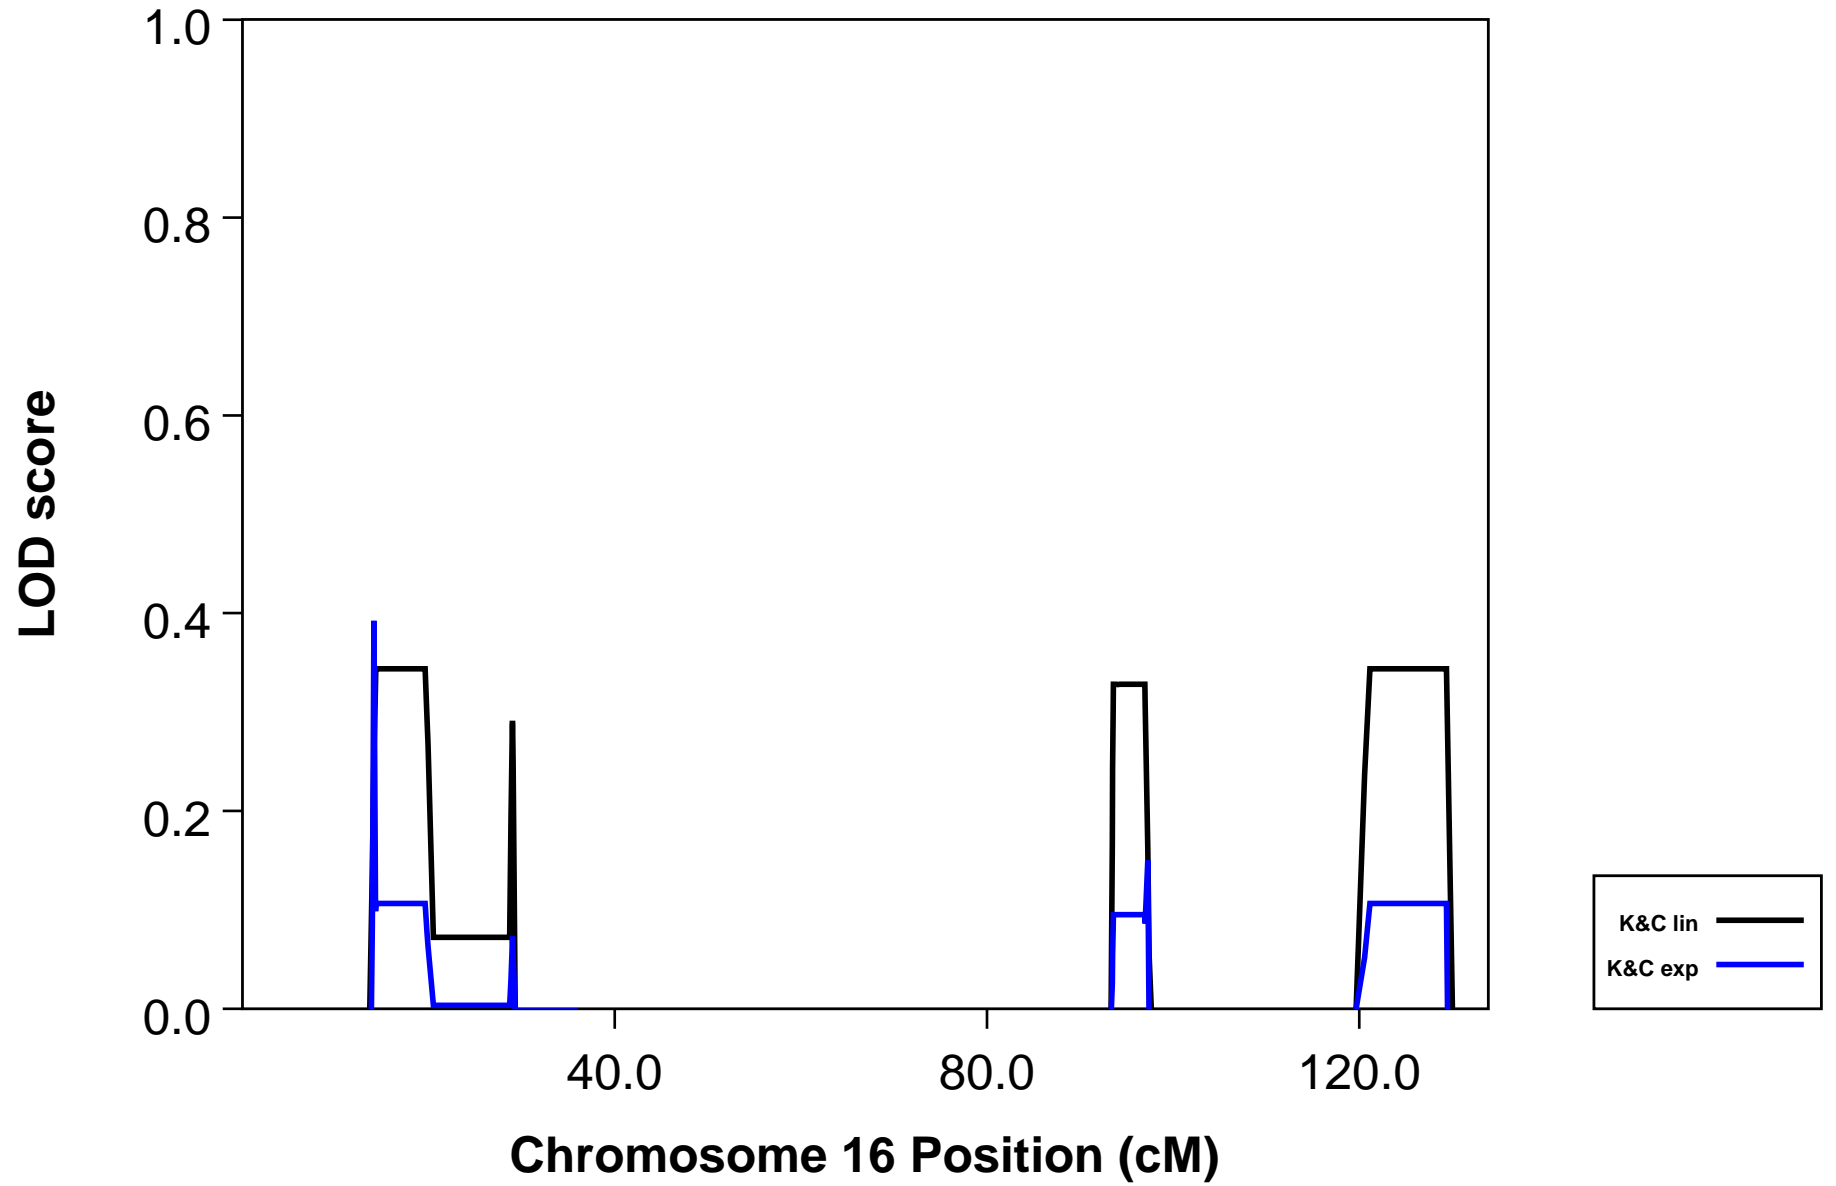

# AFFSTAT [ALL]

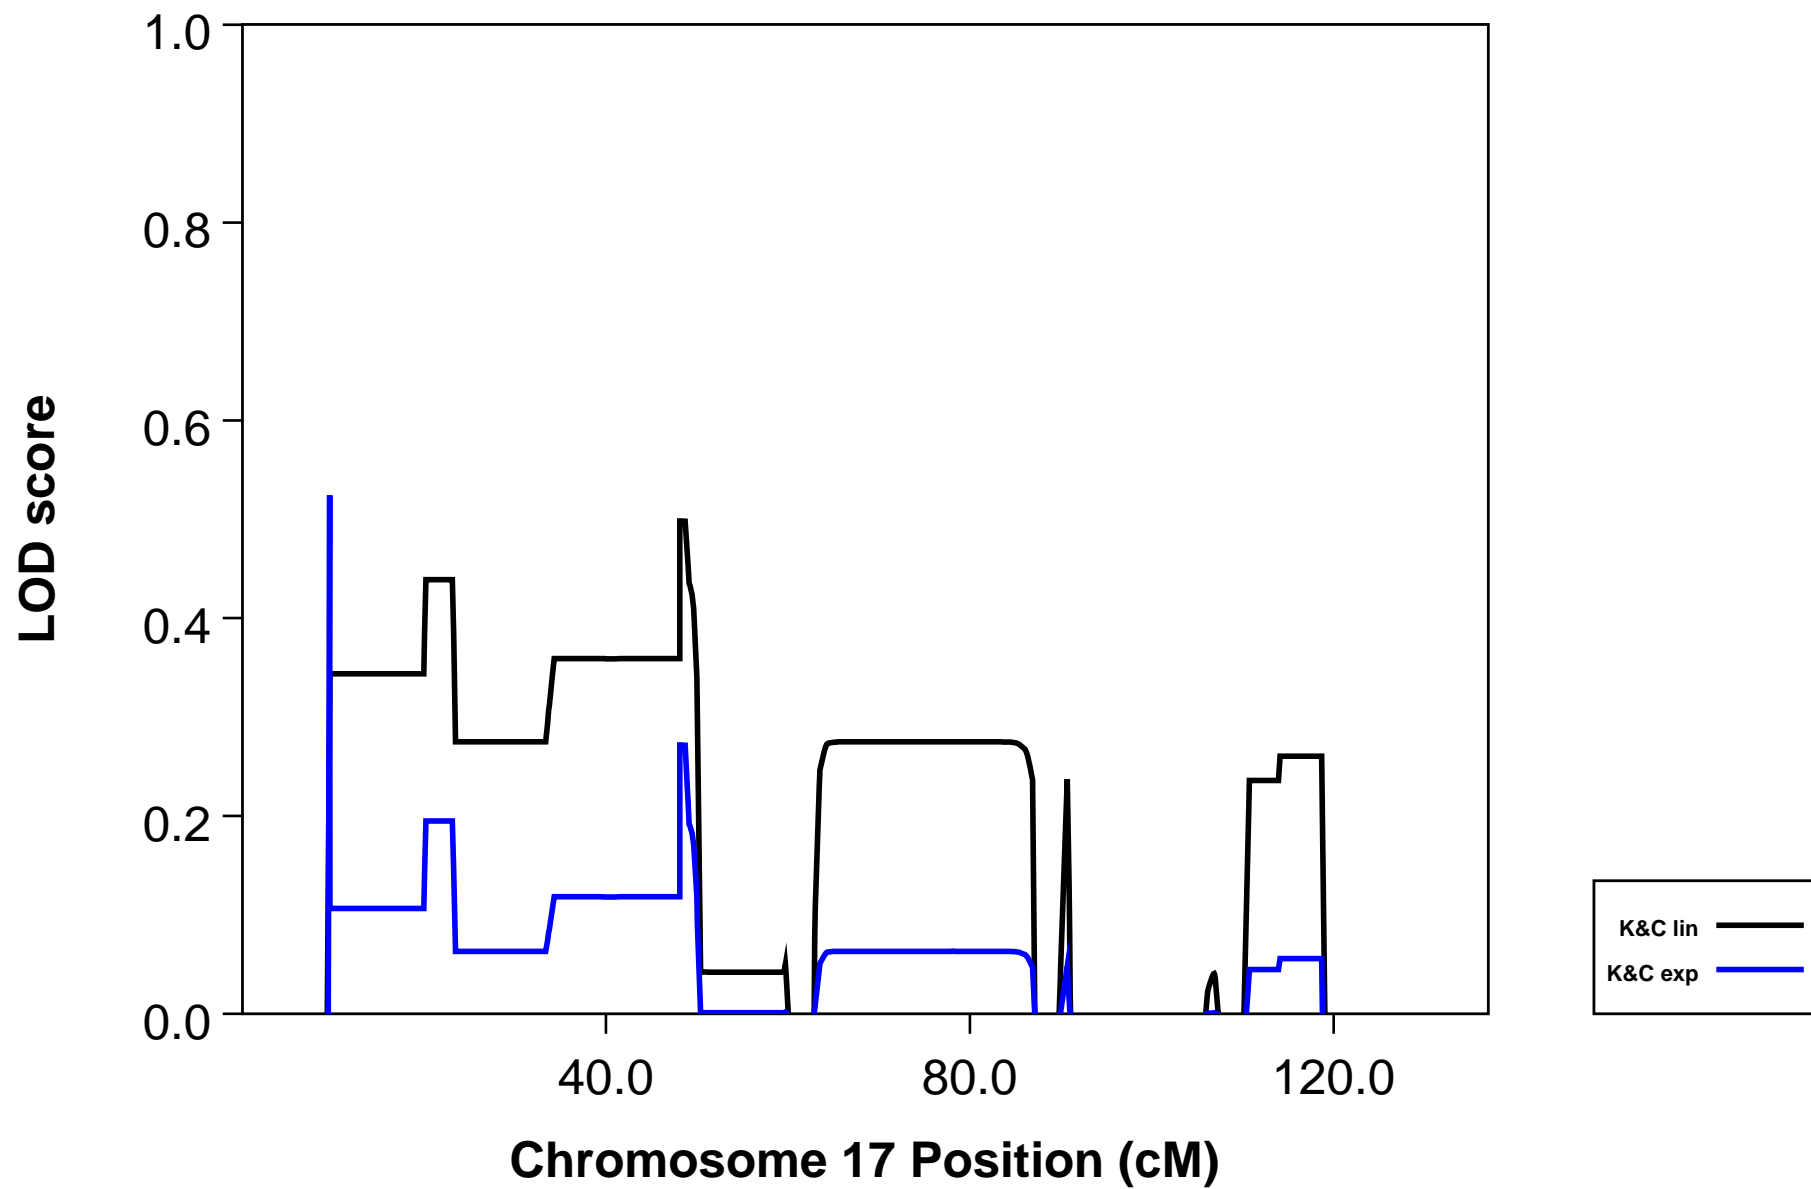

# AFFSTAT [ALL]

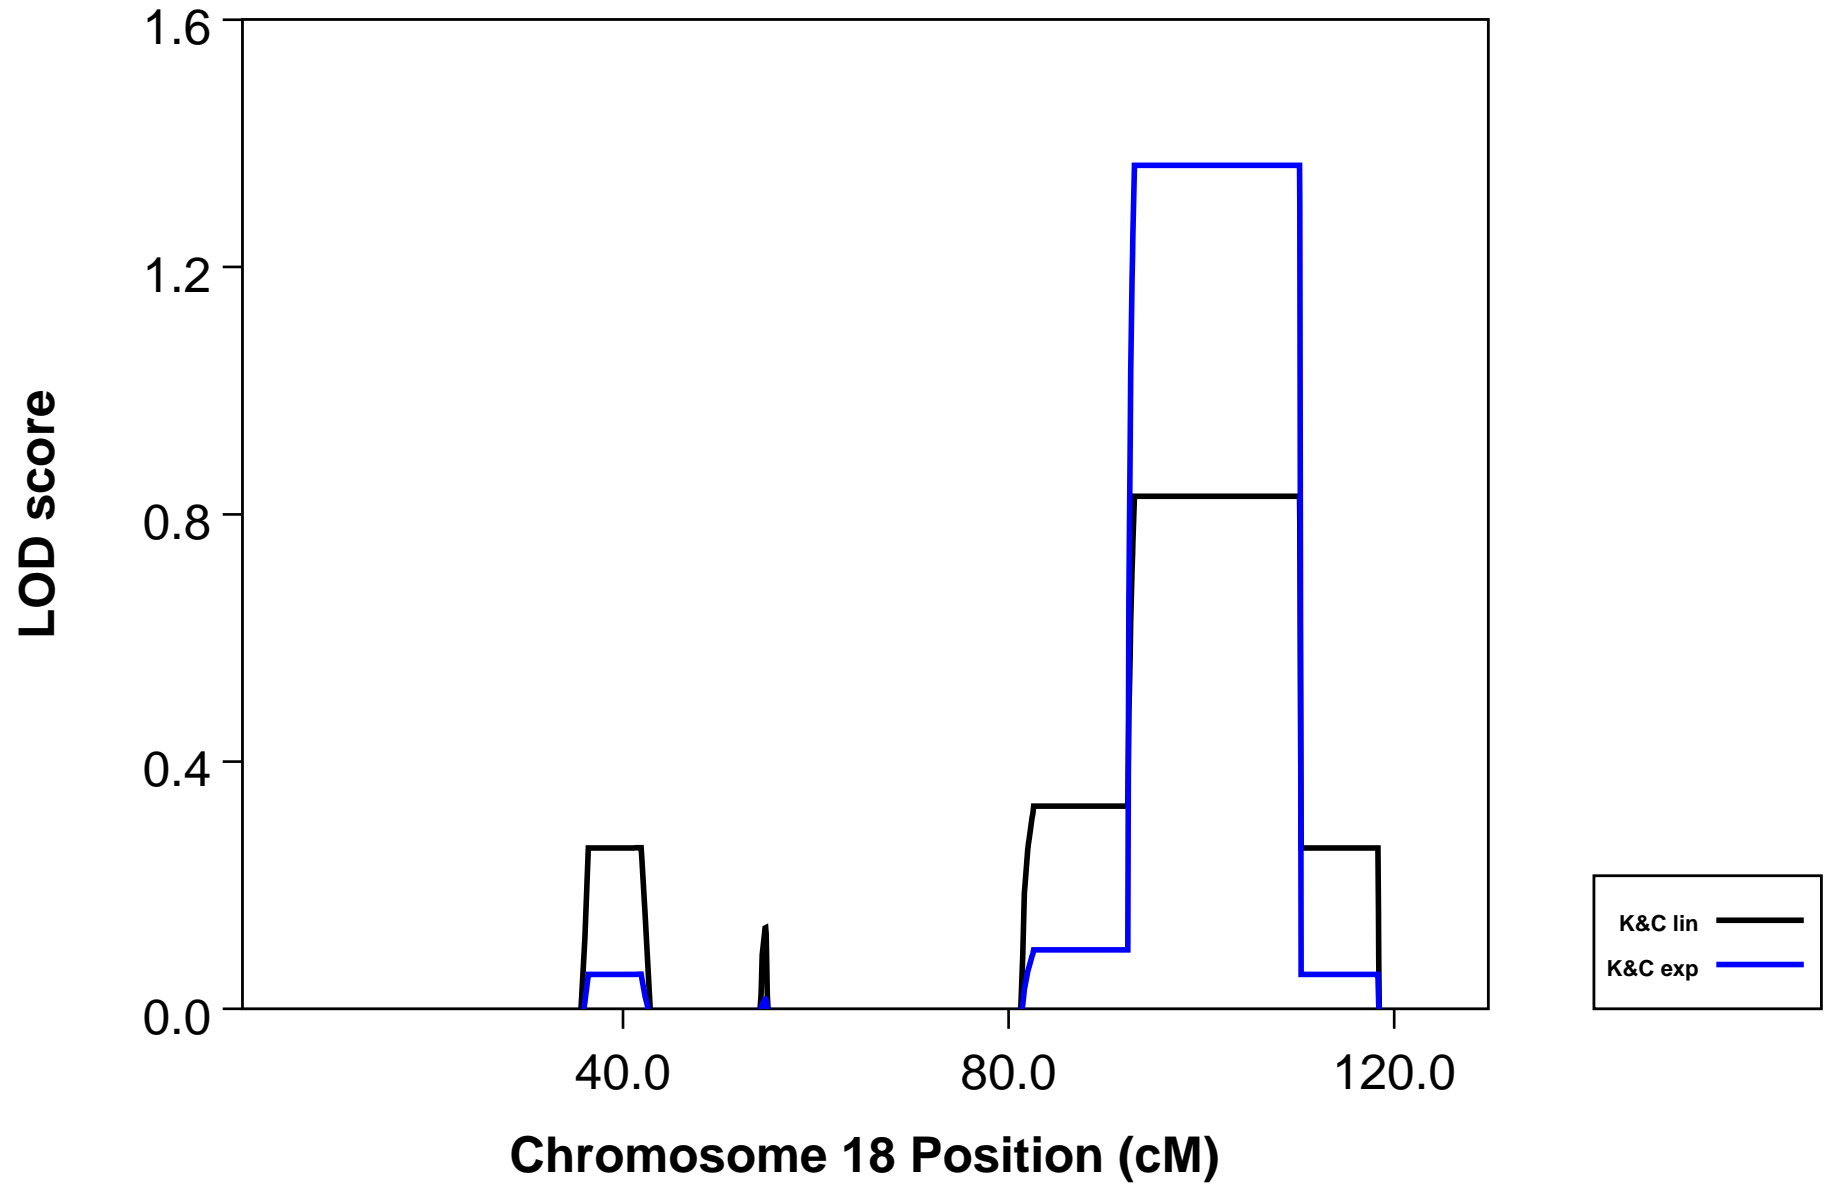

# AFFSTAT [ALL]

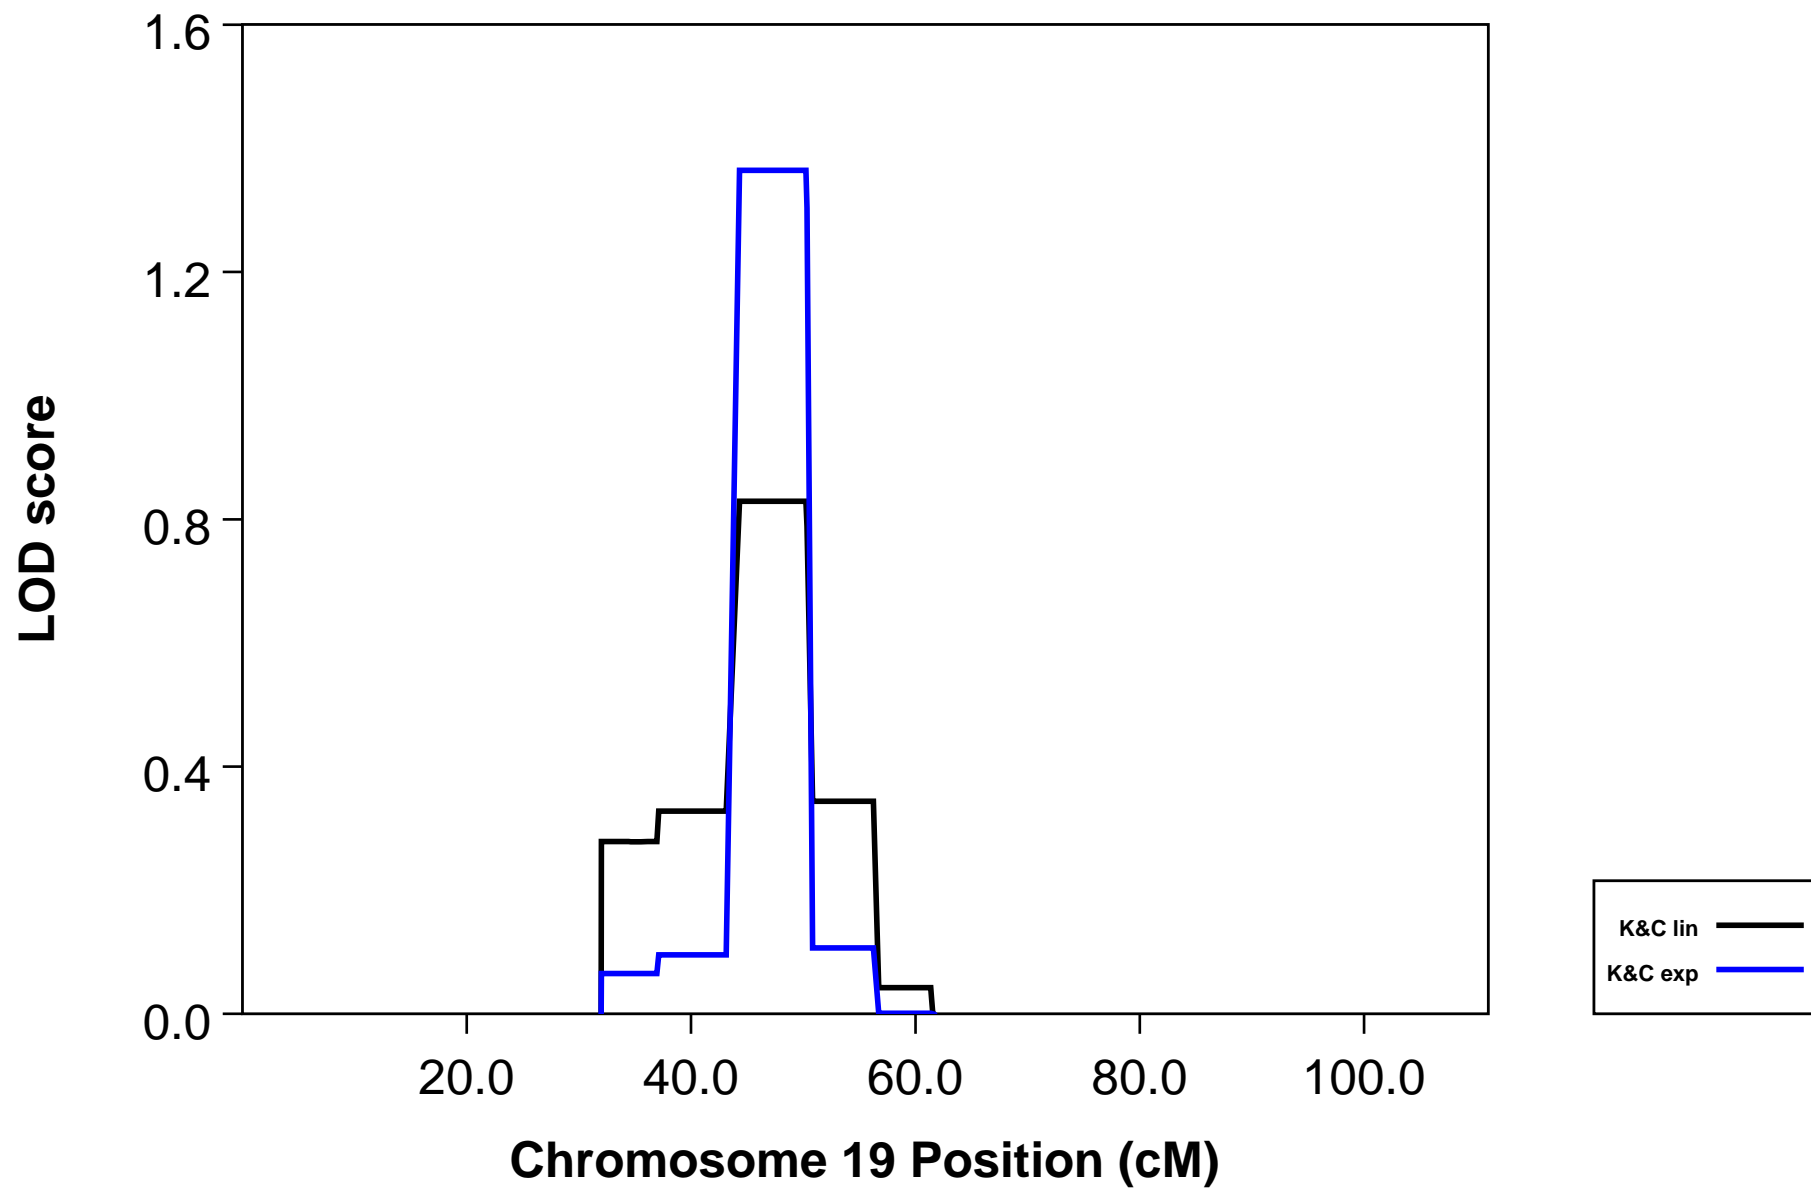

# AFFSTAT [ALL]

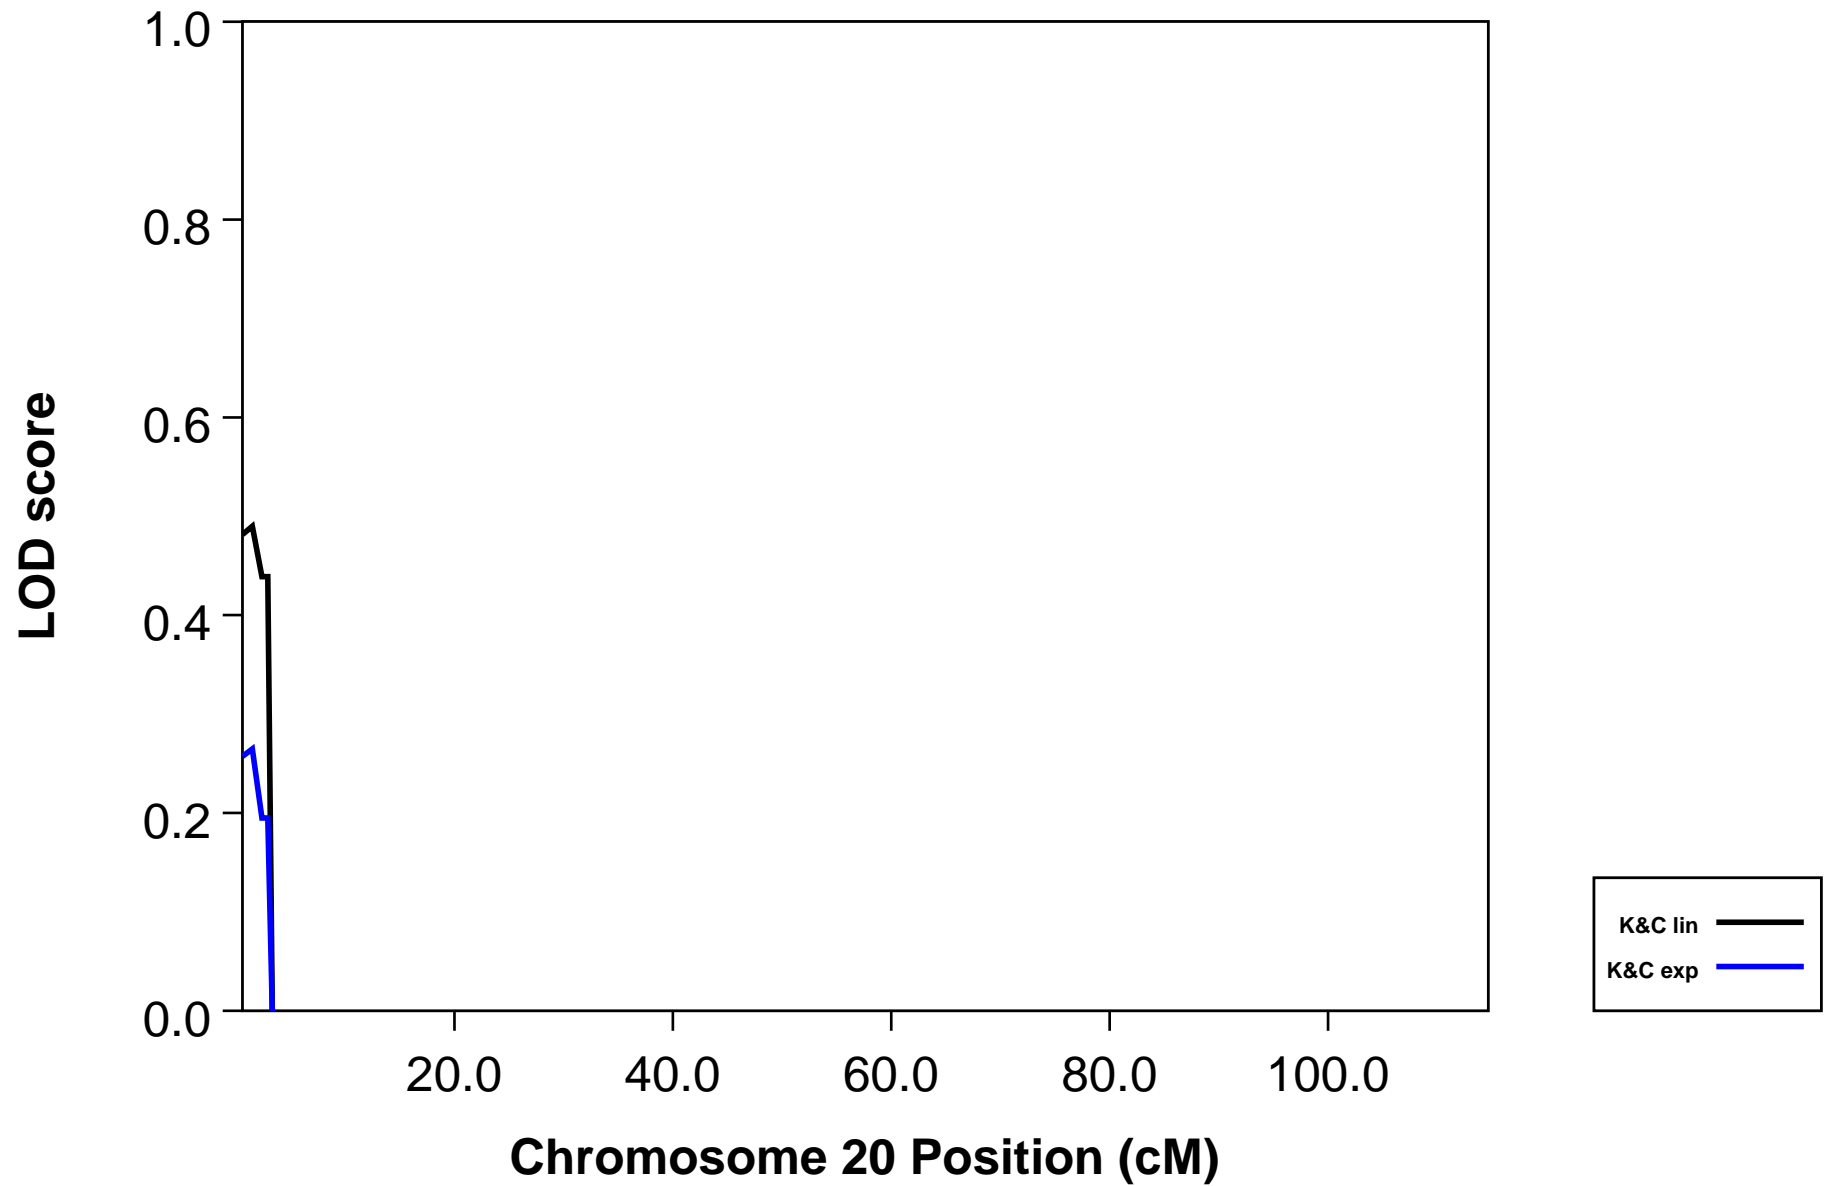



# AFFSTAT [ALL]

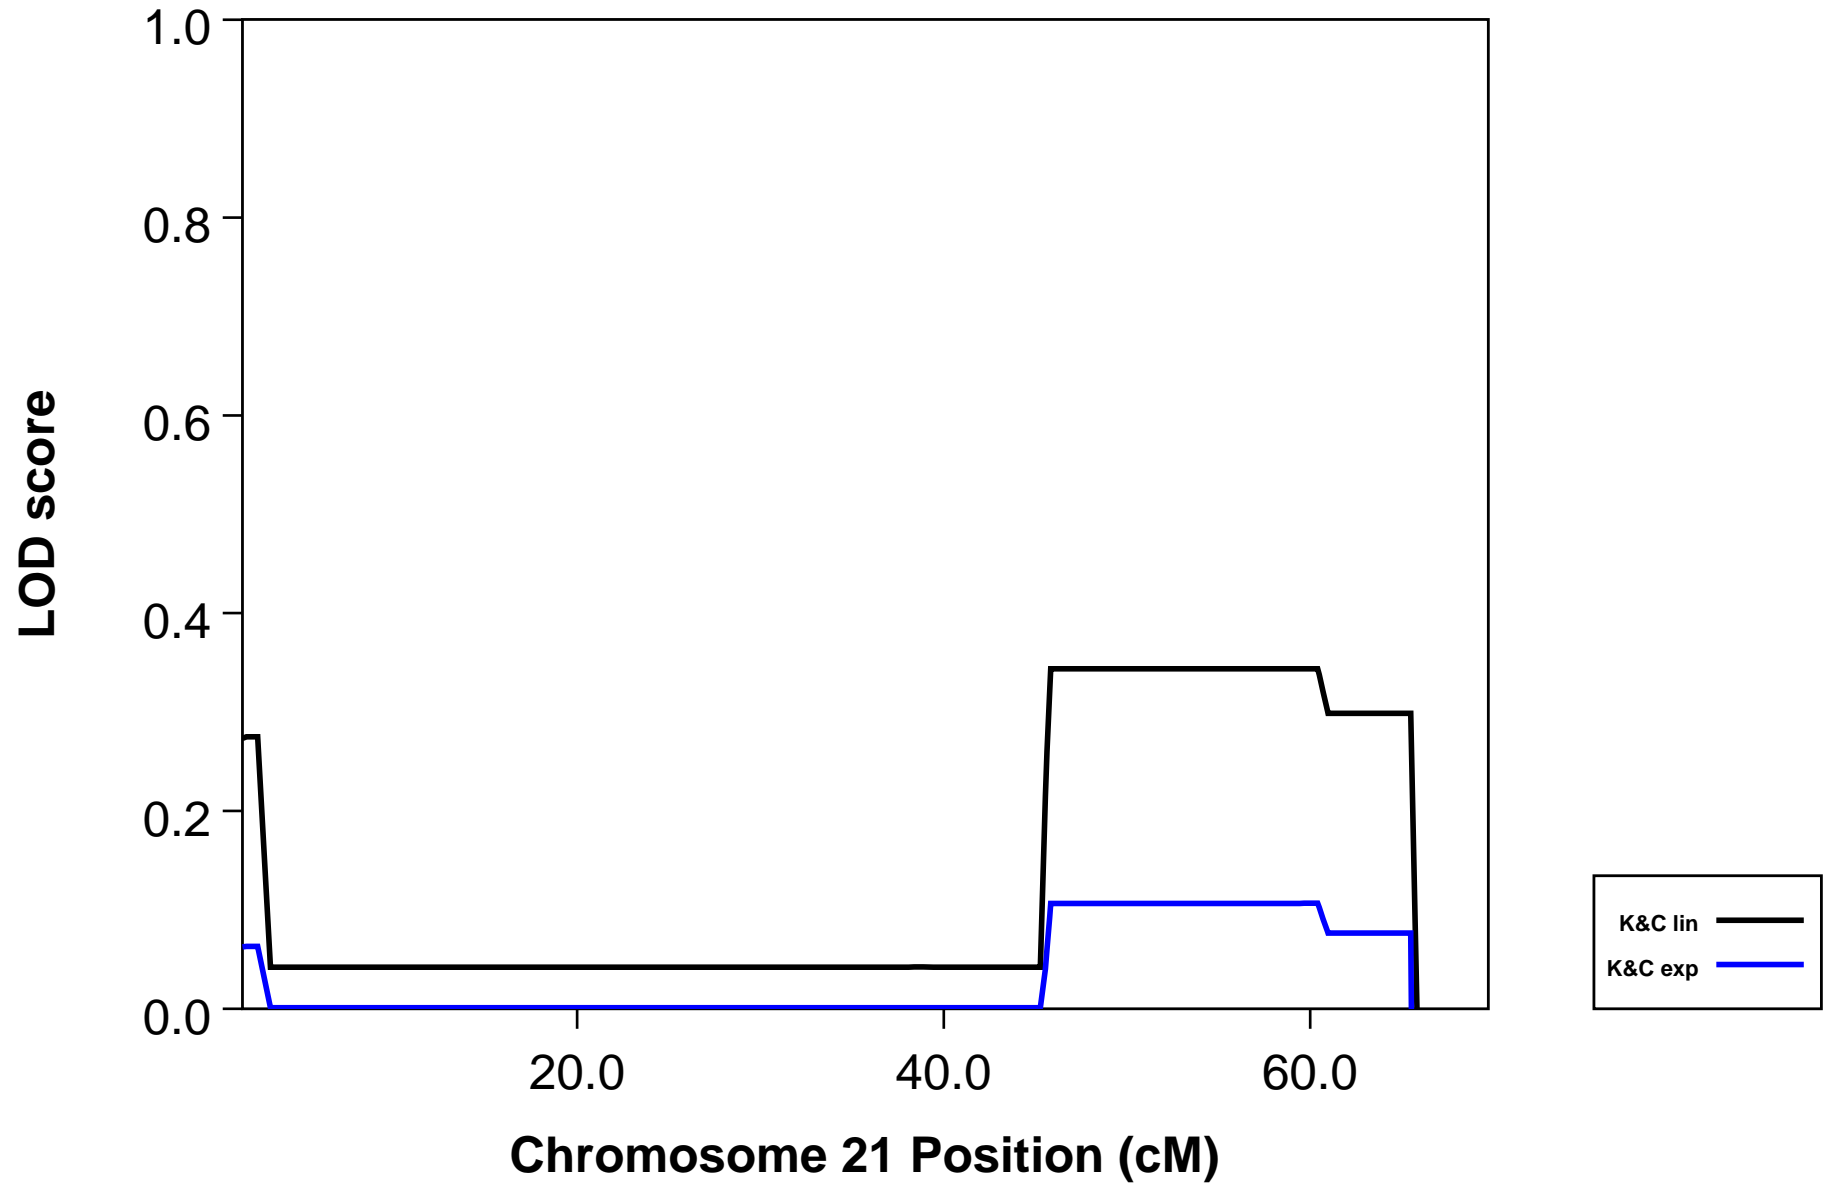

# AFFSTAT [ALL]

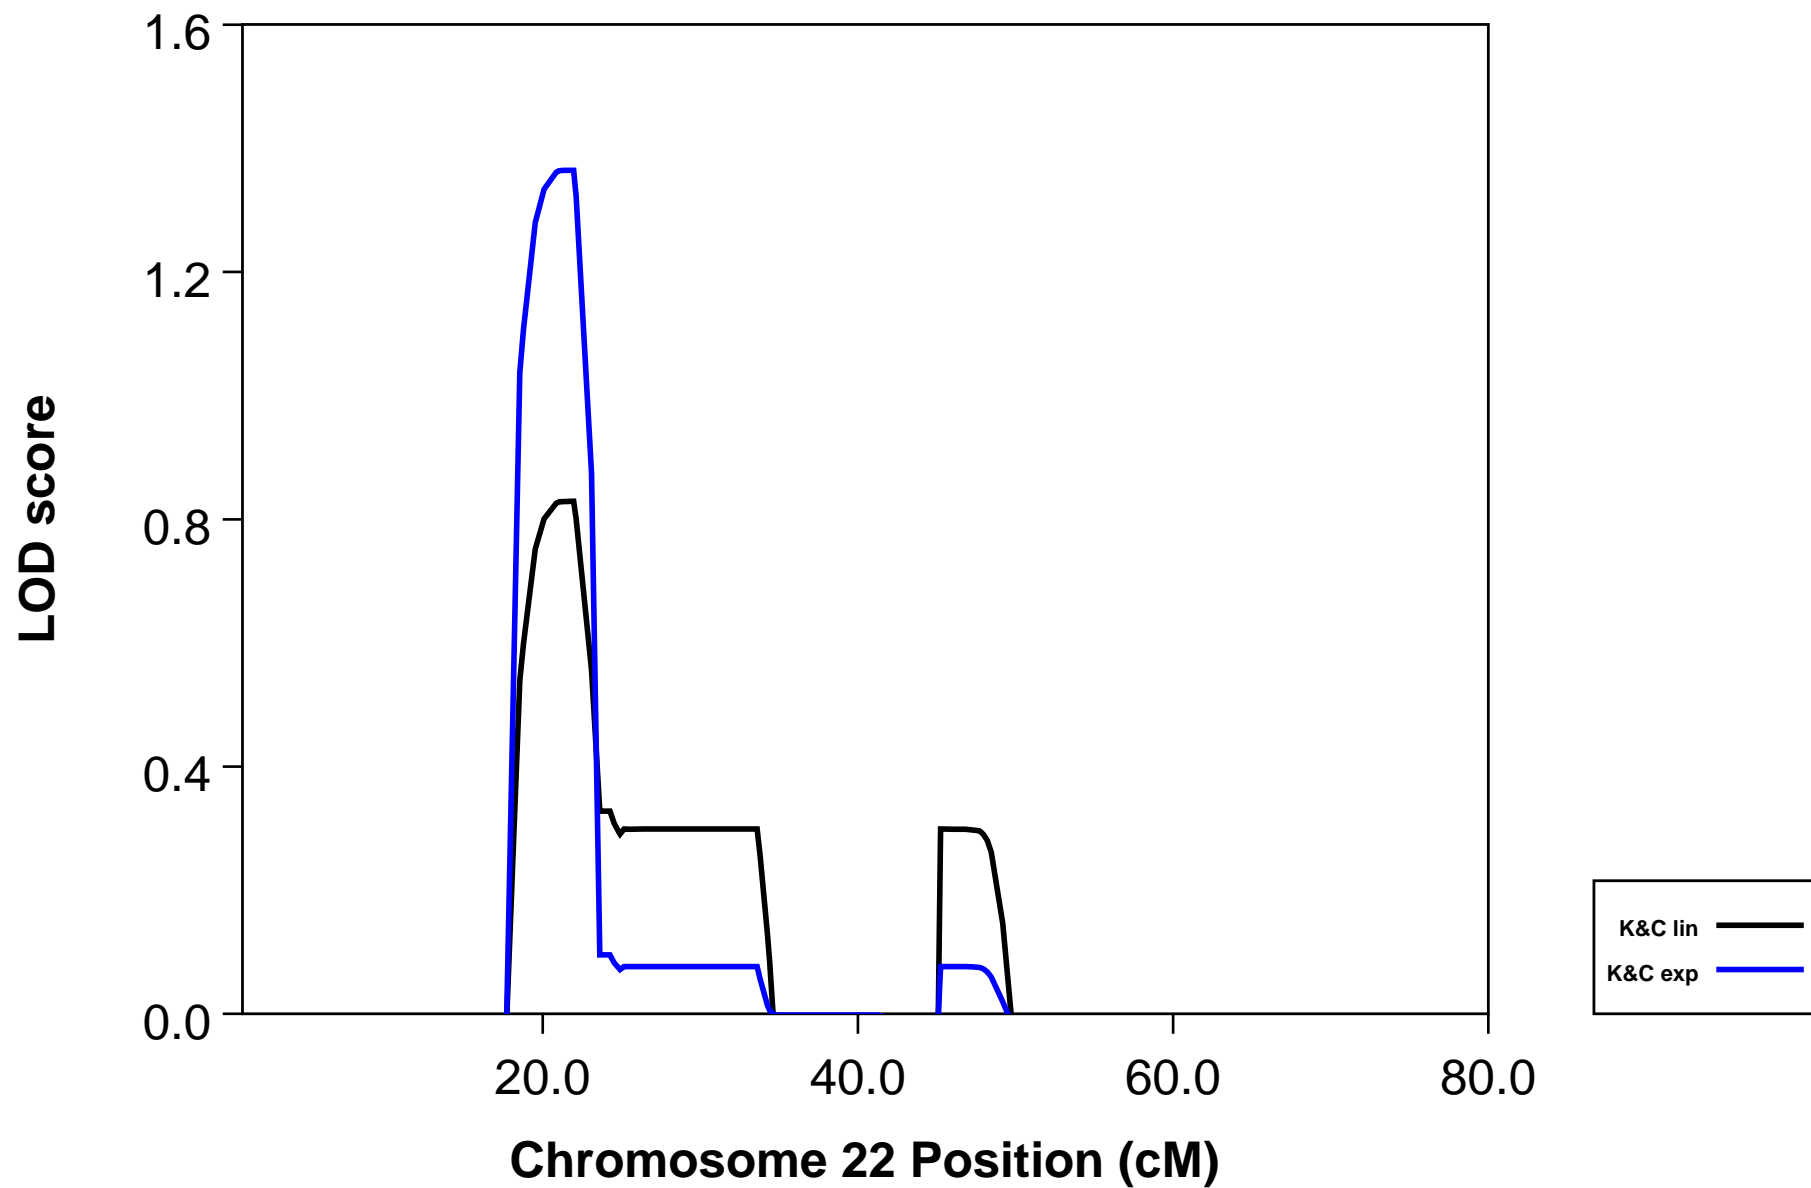

Supplement: 41598_2017_10175_MOESM1_ESM.pdf [file 41598_2017_10175_MOESM1_ESM.pdf]
